# Supplementary material for: α-Synuclein plasma membrane localization correlates with cellular phosphatidylinositol polyphosphate levels
Source: eLife journal article supplement (doi:10.7554/elife.61951), 2021-02-15

siRNA-mediated gene silencing of  $\alpha$ Syn in A2780 cells

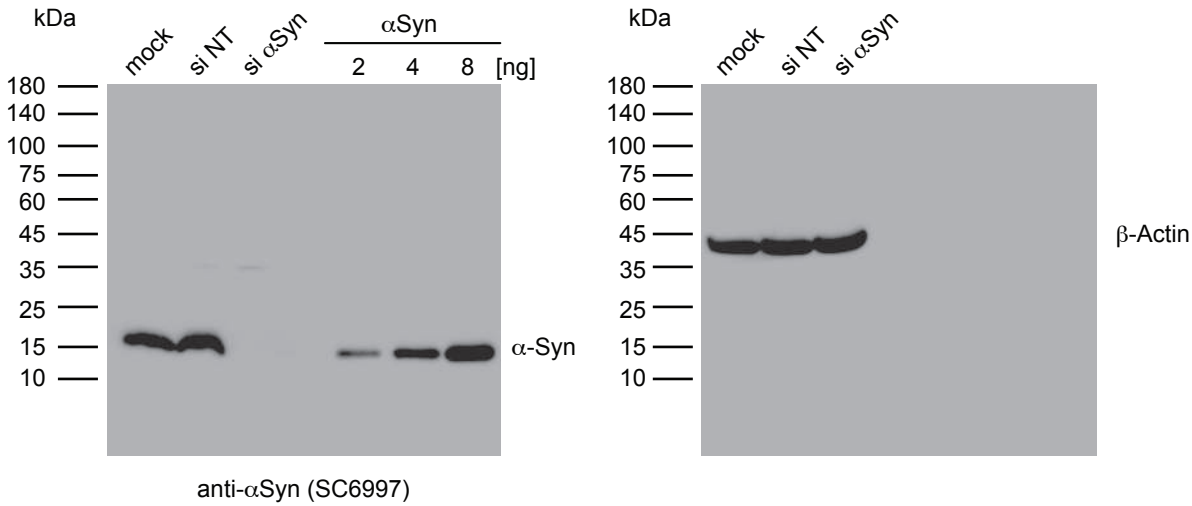

Supplement: fig1-figsupp1-data1 [file elife-61951-fig1-figsupp1-data1-v2.pdf]
