# Supplementary material for: α-Synuclein plasma membrane localization correlates with cellular phosphatidylinositol polyphosphate levels
Source: eLife journal article supplement (doi:10.7554/elife.61951), 2021-02-15
Supplement: supp [file elife-61951-supp-v1.zip]

Archive with 23 entries (23 files):
- elife_poa_e61951_Figure_1_figure_supplement_1.pdf
- elife_poa_e61951_Figure_1_figure_supplement_2.pdf
- elife_poa_e61951_Figure_2_figure_supplement_1.pdf
- elife_poa_e61951_Figure_2_figure_supplement_2.pdf
- elife_poa_e61951_Figure_2_figure_supplement_3.pdf
- elife_poa_e61951_Figure_2_figure_supplement_4.pdf
- elife_poa_e61951_Figure_3_figure_supplement_1.pdf
- elife_poa_e61951_Figure_1_source_data_1.xlsx
- elife_poa_e61951_Figure_1_figure_supplement_1_source_data_1.pdf
- elife_poa_e61951_Figure_1_figure_supplement_1_source_data_2.pdf
- elife_poa_e61951_Figure_1_figure_supplement_2_source_data_1.xlsx
- elife_poa_e61951_Figure_1_figure_supplement_2_source_data_2.pdf
- elife_poa_e61951_Figure_1_figure_supplement_2_source_data_3.pdf
- elife_poa_e61951_Figure_2_figure_supplement_1_source_data_1.xlsx
- elife_poa_e61951_Figure_2_figure_supplement_2_source_data_1.xlsx
- elife_poa_e61951_Figure_2_figure_supplement_3_source_data_1.xlsx
- elife_poa_e61951_Figure_2_figure_supplement_4_source_data_1.xlsx
- elife_poa_e61951_Figure_3_source_data_1.xlsx
- elife_poa_e61951_Figure_3_source_data_2.xlsx
- elife_poa_e61951_Figure_3_figure_supplement_1_source_data_1.xlsx
- elife_poa_e61951_Figure_3_figure_supplement_1_source_data_2.pdf
- elife_poa_e61951_Figure_3_figure_supplement_1_source_data_3.xlsx
- elife_poa_e61951_Transparent_Reporting_File.pdf
