# Supplementary material for: α-Synuclein plasma membrane localization correlates with cellular phosphatidylinositol polyphosphate levels
Source: eLife journal article supplement (doi:10.7554/elife.61951), 2021-02-15
Supplement: supp [file elife-61951-supp-v1.zip › elife_poa_e61951_Figure_1_figure_supplement_2_source_data_1.xlsx]

## Sheet: Sheet1
Quantification of aSyn Intensity/Cell at PM in GFP and PIP Kinase transfected cells_ Confocal Microscopy
Cell Name	HeLa
aSyn Intensity	[a.u]	[a.u]
Sample Name	GFP - Ctrl	PIPKIg			Statistical Significance: Calculated for the whole data set.
	0.00197108	0.0023767
	0.0217288	0.0153515			Star Values : NS > 0.05; ∗P < 0.05; ∗∗P < 0.01; ∗∗∗P < 0.001.
	0.0217634	0.0193078
	0.0254255	0.0203486			Student's t test
	0.0264798	0.0211051
	0.0275985	0.0238657			Cell name	Comparison		t-Value	Star
	0.0280822	0.0245744			HeLa	GFP-Ctrl vs PIPKIg		< 0.0001	***
	0.0284705	0.0263739
	0.0291571	0.0269148
	0.0310749	0.0310744
	0.0331175	0.034765
	0.0335377	0.0382801
	0.0336227	0.0435428
	0.0340545	0.0457688
	0.0354774	0.0465392
	0.0367286	0.0479677
	0.0379465	0.0506864
	0.0383238	0.0519824
	0.0385393	0.0537551
	0.0398914	0.0553444
	0.0406838	0.0599392
	0.0415621	0.0601449
	0.0416415	0.0615357
	0.0418777	0.0637257
	0.0420691	0.0644163
	0.042884	0.0736075
	0.043593	0.0741454
	0.0441803	0.0770598
	0.0442394	0.0822278
	0.0463053	0.0839768
	0.0468705	0.0872055
	0.0480864	0.0884185
	0.0484565	0.0921807
	0.0485589	0.0972815
	0.0486924	0.102841
	0.0489847	0.105038
	0.050213	0.111461
	0.0509039	0.112474
	0.0516957	0.125892
	0.0520057	0.129196
	0.0549	0.133445
	0.0553395	0.135472
	0.0577118	0.138583
	0.0585482	0.139431
	0.0588958	0.143695
	0.0592911	0.147609
	0.0598335	0.164761
	0.0603309	0.168337
	0.0617336	0.174797
	0.0618673	0.175212
	0.0625823	0.178428
	0.062981	0.189846
	0.0633545	0.193014
	0.0639175	0.193014
	0.0641071	0.194804
	0.0643325	0.209141
	0.065702	0.213522
	0.0657472	0.215291
	0.0663362	0.216952
	0.066792	0.259989
	0.0677464	0.27254
	0.0687054	0.338075
	0.0691833	0.338728
	0.0733924	0.424154
	0.0751665	0.442794
	0.0754636	0.442794
	0.0762353	0.460104
	0.0790763	0.463777
	0.0805655	0.506676
	0.081362	0.550991
	0.0827767	0.570192
	0.0843318	0.579195
	0.0868896	0.604122
	0.0899899	0.610706
	0.0904061	0.626392
	0.0920076	0.649856
	0.092719	0.665117
	0.0937779	0.671249
	0.0967799	0.687118
	0.0992849	0.700719
	0.108785	0.732437
	0.109548	0.756508
	0.115808	0.76144
	0.116579	0.76697
	0.117203	0.782051
	0.117797	0.803914
	0.118366	0.822616
	0.123437	0.931599
	0.124267	0.937346
	0.129974	0.972718
	0.135327	1.0103
	0.152463	1.02527
	0.153725	1.14782
	0.154563	1.17135
	0.168184	1.22825
	0.181634	1.28535
	0.184419	1.38357
	0.189541	1.48926
	0.191552	1.5212
	0.207679	1.59586
	0.213754	1.67212
	0.214916	1.73192
	0.220538	1.77244
	0.222379	1.80171
	0.226555	1.80304
	0.255024	1.94456
	0.277084	2.19573
	0.281112	2.31849
	0.288534	2.60856
	0.300079	2.6611
	0.314431	2.76585
	0.328239
	0.339693
	0.34507
	0.355084
