# Supplementary material for: α-Synuclein plasma membrane localization correlates with cellular phosphatidylinositol polyphosphate levels
Source: eLife journal article supplement (doi:10.7554/elife.61951), 2021-02-15

Transient GFP, PIPK1 $\gamma$  (active or inactive) expression did not affect overall  $\alpha$ Syn abundance in cells

A2780

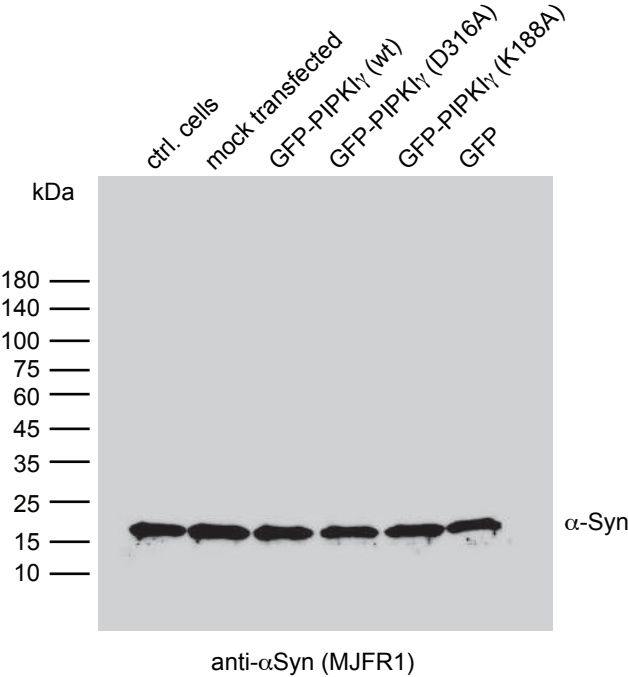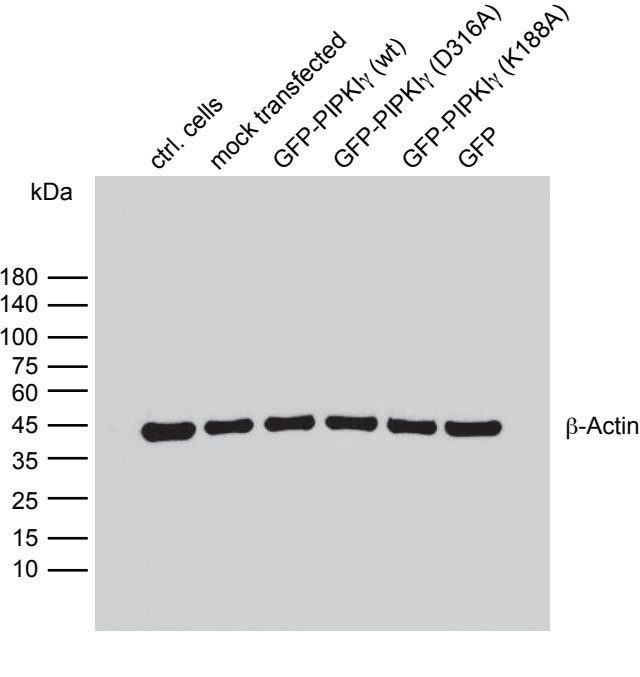

SH-SY5Y

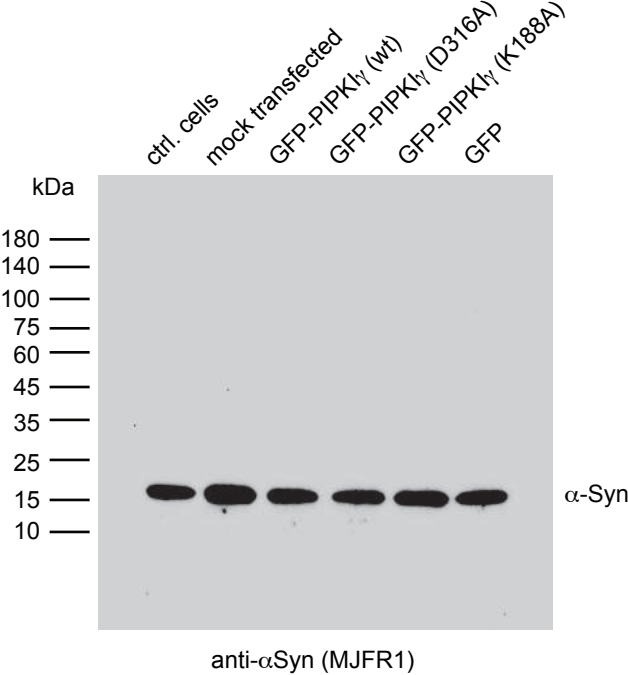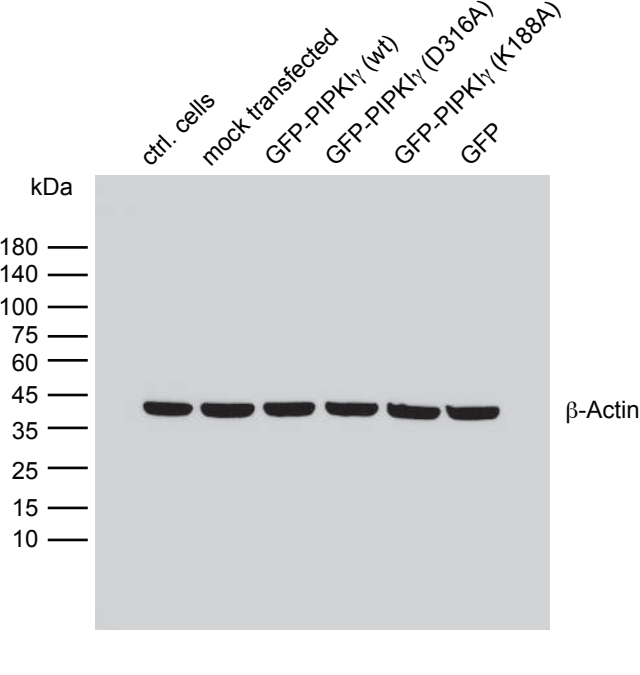

Supplement: supp [file elife-61951-supp-v1.zip › elife_poa_e61951_Figure_1_figure_supplement_2_source_data_2.pdf]
