# Supplementary material for: α-Synuclein plasma membrane localization correlates with cellular phosphatidylinositol polyphosphate levels
Source: eLife journal article supplement (doi:10.7554/elife.61951), 2021-02-15
Supplement: supp [file elife-61951-supp-v1.zip › elife_poa_e61951_Figure_1_source_data_1.xlsx]

## Sheet: Sheet1
Quantification of aSyn Intensity/Cell at PM in GFP and PIP Kinase transfected cells_ Confocal Microscopy
Cell Name	A2780				SH-SY5Y
aSyn Intensity	[a.u]	[a.u]			[a.u]	[a.u]
Sample Name	GFP - Ctrl	PIPKIg			GFP - Ctrl	PIPKIg			Statistical Significance: Calculated for the whole data set.
	0.007698	0.101001			1.2741	1.0399
	0.11651	0.158397			0.9882	0.9783			Star Values : NS > 0.05; ∗P < 0.05; ∗∗P < 0.01; ∗∗∗P < 0.001.
	0.214635	0.381319			0.94848	0.92321
	0.250872	0.408614			0.98276	0.89429			Student's t test
	0.314762	0.416421			1.0512	0.88718
	0.322386	0.439821			1.2818	0.86249			Cell name	Comparison		t-Value	Star
	0.361731	0.44926			0.65168	0.84882			A2780	GFP-Ctrl vs PIPKIg		< 0.0001	***
	0.371308	0.526605			0.80888	0.8403
	0.371879	0.53109			0.65332	0.83392			SH-SY5Y	GFP-Ctrl vs PIPKIg		< 0.0001	***
	0.376	0.565707			1.3842	0.7929
	0.406311	0.615337			1.1016	0.78498
	0.409896	0.627063			1.1888	2.4264
	0.422286	0.639391			1.2906	2.3863
	0.473056	0.640779			0.94016	2.3148
	0.491009	0.647692			1.2144	2.2778
	0.493097	0.654955			0.80924	2.0797
	0.505598	0.67739			1.1248	2.0056
	0.566264	0.707984			0.91268	1.9846
	0.573875	0.744174			0.9778	1.879
	0.583043	0.751483			1.0985	1.8605
	0.593521	0.778691			0.97508	1.8512
	0.599769	0.779462			1.0564	1.7695
	0.601732	0.78846			0.94336	1.7553
	0.60397	0.792442			0.77652	1.7227
	0.623256	0.801145			0.88296	1.6942
	0.632159	0.807269			1.4284	1.6925
	0.642027	0.809488			1.1737	1.6537
	0.645804	0.813166			1.4487	1.5556
	0.660888	0.816358			0.89108	1.537
	0.661101	0.829199			0.95768	1.5326
	0.669647	0.86284			1.1446	1.5259
	0.682359	0.878889			0.69254	1.5023
	0.682922	0.918199			0.58264	1.4779
	0.683465	0.949516			0.55729	1.4576
	0.685965	0.955959			0.73496	1.4294
	0.69625	0.95629			0.79449	1.4147
	0.710706	0.974007			0.70692	1.4063
	0.723074	0.977704			0.73253	1.3726
	0.741375	0.99048			0.57503	1.3516
	0.748406	0.997961			0.50365	1.3422
	0.749006	1.02952			0.50365	1.3308
	0.749314	1.03445			0.73253	1.3223
	0.761316	1.05015			0.83207	1.3201
	0.768021	1.06114			0.81086	1.3031
	0.771106	1.06296			0.98413	1.2878
	0.777274	1.06374			0.46808	1.2865
	0.798975	1.06877			0.474	1.2768
	0.803055	1.09533			0.45572	1.2482
	0.803709	1.09608			0.53488	1.2305
	0.822805	1.09866			0.71908	1.226
	0.855327	1.1096			0.70668	1.2195
	0.886931	1.12764			0.69012	1.215
	0.89082	1.13634			0.56416	1.2068
	0.899783	1.14775			0.53352	1.2037
	0.905746	1.14871			0.51712	1.1838
	0.922495	1.16306			0.49472	1.1783
	0.939622	1.17909			0.52956	1.1673
	0.944231	1.26799			0.59936	1.1666
	0.952433	1.28861			0.55084	1.1598
	0.973984	1.29136			0.60556	1.1595
	0.974301	1.29573			0.4896	1.151
	0.974473	1.29645			0.5358	1.137
	0.975609	1.30846			0.49252	1.135
	0.999055	1.32503			0.4784	1.1325
	1.00695	1.32585			0.4998	1.1256
	1.03472	1.33527			0.54628	1.1183
	1.04001	1.35833			0.51008	1.1085
	1.04089	1.35903			0.49908	1.1019
	1.04256	1.36025			0.56464	1.0955
	1.04632	1.39833			0.50172	1.0954
	1.06171	1.40946			0.47324	1.0903
	1.1076	1.40998			0.4906	1.0748
	1.11796	1.45328			0.46328	1.0622
	1.11936	1.45818			0.65928	1.0491
	1.1243	1.47076			0.53716	1.0466
	1.12468	1.47261			0.66288	1.0457
	1.12825	1.49245			0.47792	1.0424
	1.15751	1.54748			0.488	1.0384
	1.15931	1.55882			0.48992	1.0253
	1.18516	1.67389			0.52728	1.0115
	1.19646	1.67808			0.48224	1.0112
	1.1975	1.7177			0.50984	1.0061
	1.20018	1.73947			0.551	1
	1.2125	1.79413			0.52452	0.945
	1.21804	1.82461			0.50644	0.94268
	1.21853	1.82612			0.61944	0.93452
	1.23111	1.83153			0.55684	0.9279
	1.25404	1.84143			0.56288	0.91176
	1.26228	1.88941			0.50388	0.91168
	1.27939	1.95809			0.563	0.9076
	1.28156	1.97514			0.50896	0.88304
	1.29303	2.04224			0.48728	0.86325
	1.32462	2.1117			0.50232	0.84586
	1.33128	2.16203			0.6256	0.84268
	1.36348	2.16695			0.6348	0.78129
	1.36912	2.21696			0.62656	0.77898
	1.36989	2.22677			0.65464	0.77456
	1.3727	2.23397			0.548	0.77443
	1.37685	2.25917			0.64184	0.77032
	1.4089	2.27028			0.61624	0.75493
	1.41642	2.27889			0.5308	0.75157
	1.43924	2.28635			0.51504	0.74054
	1.45268	2.29365			0.5138	0.73457
	1.45829	2.31789			0.5474	0.72899
	1.47785	2.39107			0.62944	0.71377
	1.49307	2.39927			0.60692	0.70926
	1.50364	2.40334			0.75152	0.69776
	1.50886	2.40603			0.57264	0.69159
	1.52037	2.43565			0.62388	0.69062
	1.53932	2.44819			0.6184	0.6761
	1.72906	2.52303			0.5682	0.66843
	1.87403	2.61997			0.54728	0.65362
	2.02528	2.65005			0.55732	0.6204
	2.0385	2.85845			0.53652	0.60736
	2.1735	2.87958			0.51128	0.56651
	2.17797	2.89502			0.49148	0.52382
	2.26334	3.20119
	2.34179	3.49996
	2.48803	3.86972
		3.94597
