# Supplementary material for: α-Synuclein plasma membrane localization correlates with cellular phosphatidylinositol polyphosphate levels
Source: eLife journal article supplement (doi:10.7554/elife.61951), 2021-02-15
Supplement: supp [file elife-61951-supp-v1.zip › elife_poa_e61951_Figure_2_figure_supplement_1_source_data_1.xlsx]

## Sheet: Pi45P2_NMR_data.txt
Residue-resolved NMR signal attenuation profiles (I/I0) of free (I0) versus PIP2 bound (I) aSyn at indicated molar ratios
aSyn proline residues without peptide amide resonances have no I/I0 values (NaN).
aSyn residue #	I/I0 @ aSyn:PIP2 = 1:1	I/I0 @ aSyn:PIP2 = 1:5	I/I0 @ aSyn:PIP2 = 1:10	I/I0 @ aSyn:PIP2 = 1:15	I/I0 @ aSyn:PIP2 = 1:20	I/I0 @ aSyn:PIP2 = 1:30
1	0.658	0.1529	0	0	0	0
2	0.6111	0.1488	0	0	0	0
3	0.715	0.1821	0	0	0	0
4	0.6795	0.1763	0	0	0	0
5	0.5933	0.1786	0	0	0	0
6	0.6745	0.181	0	0	0	0
7	0.5968	0.1436	0	0	0	0
8	0.684	0.1585	0	0	0	0
9	0.6112	0.1516	0	0	0	0
10	0.6238	0.2365	0	0	0	0
11	0.7208	0.2333	0.0579	0.0167	0	0
12	0.6806	0.2359	0.0595	0.0585	0	0
13	0.6964	0.2525	0.0631	0.069	0	0
14	0.6003	0.2011	0.0601	0.0604	0	0
15	0.7856	0.2943	0.077	0.055	0	0
16	0.7529	0.2969	0.0927	0.0595	0	0
17	0.7223	0.2595	0.0822	0.0489	0	0
18	0.7551	0.2829	0.0886	0.0724	0	0
19	0.7876	0.359	0.1236	0.0992	0	0
20	0.765	0.3101	0.0968	0.0701	0	0
21	0.7018	0.3065	0.113	0.1115	0	0
22	0.7887	0.3625	0.1236	0.0955	0	0
23	0.7516	0.3465	0.1238	0.097	0	0
24	0.8531	0.4027	0.1782	0.1325	0	0
25	0.7556	0.3513	0.1303	0.0998	0	0
26	0.8511	0.4231	0.1805	0.1328	0	0
27	0.8126	0.3865	0.1606	0.1279	0	0
28	0.841	0.4185	0.1594	0.1242	0	0
29	0.8169	0.4195	0.1316	0.1102	0	0
30	0.8902	0.4451	0.1791	0.1278	0	0
31	0.7957	0.3881	0.1449	0.11	0	0
32	0.8534	0.4515	0.148	0.1266	0	0
33	0.8703	0.4356	0.1638	0.1187	0	0
34	0.7795	0.4567	0.1584	0.1104	0	0
35	0.8186	0.4265	0.1785	0.1174	0	0
36	0.8258	0.4978	0.1864	0.1204	0	0
37	0.8395	0.5098	0.1991	0.1348	0	0
38	0.986	0.5851	0.1871	0.1635	0	0
39	0.9368	0.5597	0.2016	0.1533	0	0
40	0.9589	0.5824	0.2165	0.1736	0	0
41	0.9364	0.5815	0.2082	0.1541	0	0
42	0.9034	0.5431	0.1948	0.1426	0	0
43	0.9532	0.6497	0.2614	0.1636	0	0
44	1	0.6669	0.2518	0.1809	0	0
45	0.9379	0.6079	0.2156	0.1658	0	0
46	0.9727	0.6244	0.22	0.2122	0	0
47	0.9205	0.5759	0.201	0.165	0	0
48	1.0122	0.6748	0.2496	0.1867	0	0
49	0.9915	0.7478	0.3235	0.229	0	0
50	0.9747	0.6767	0.2522	0.1855	0	0
51	1.0134	0.723	0.3062	0.2556	0	0
52	1.044	0.7504	0.2994	0.2347	0	0
53	0.9944	0.6696	0.2699	0.1748	0	0
54	0.9824	0.7705	0.2871	0.2067	0	0
55	1.0453	0.7309	0.307	0.2236	0	0
56	1.0664	0.7929	0.3007	0.2235	0	0
57	1.0255	0.7551	0.2903	0.2173	0	0
58	1	0.7139	0.2696	0.185	0	0
59	1.0617	0.7781	0.2901	0.2112	0	0
60	1.0073	0.7195	0.2551	0.209	0	0
61	0.9818	0.6826	0.3035	0.1886	0	0
62	1.0436	0.7287	0.3052	0.1907	0	0
63	1.022	0.7615	0.3451	0.2414	0	0
64	1.013	0.7306	0.2861	0.2054	0	0
65	1.028	0.7863	0.3838	0.2378	0	0
66	1.0129	0.7163	0.3105	0.2206	0	0
67	1.0352	0.7713	0.2934	0.2036	0	0
68	1.0224	0.7476	0.2841	0.2083	0	0
69	1.0214	0.7351	0.3015	0.2138	0	0
70	1.0808	0.7714	0.3423	0.258	0	0
71	1.084	0.7434	0.3239	0.2362	0	0
72	1.0134	0.6948	0.3038	0.2098	0	0
73	1.0393	0.7531	0.3242	0.2349	0	0
74	1.0354	0.7682	0.2906	0.2251	0	0
75	1.0559	0.7776	0.3141	0.2314	0	0
76	1.0042	0.7794	0.2997	0.2187	0	0
77	1.0417	0.7834	0.323	0.2346	0	0
78	1.0481	0.7582	0.3134	0.2106	0	0
79	1.0677	0.7893	0.3346	0.2238	0	0
80	1.0243	0.7346	0.2957	0.208	0	0
81	1.0643	0.7892	0.3028	0.2248	0	0
82	1.0537	0.7921	0.3411	0.2486	0	0
83	1.0133	0.7466	0.3084	0.202	0	0
84	1.0248	0.7393	0.3141	0.2058	0	0
85	1.0321	0.7715	0.2875	0.2132	0	0
86	1.008	0.7476	0.2802	0.2021	0	0
87	1.0492	0.762	0.3357	0.2235	0	0
88	1.1253	0.8263	0.3712	0.2229	0	0
89	1.0356	0.8038	0.3063	0.2125	0	0
90	1.0686	0.8079	0.3144	0.2081	0	0
91	1.0222	0.7394	0.3186	0.22	0	0
92	1.0133	0.8269	0.3248	0.2367	0	0
93	1.0623	0.7643	0.3086	0.2221	0	0
94	1.0808	0.8225	0.247	0.1475	0	0
95	1.0633	0.7909	0.3003	0.2253	0	0
96	1.0648	0.7944	0.3225	0.221	0	0
97	1.0319	0.7512	0.2796	0.1929	0	0
98	1.0887	0.8546	0.3462	0.2327	0	0
99	1.0472	0.7544	0.3248	0.2251	0	0
100	1.0575	0.859	0.3932	0.3208	0	0
101	1.057	0.8757	0.4301	0.3788	0.1809	0.1701
102	1.0106	0.8467	0.4296	0.4177	0.4478	0.37
103	1.0706	0.875	0.5703	0.5094	0.6592	0.5212
104	1.044	0.8079	0.6667	0.5494	0.7628	0.6873
105	0.9982	0.8957	0.6695	0.6361	0.7281	0.7891
106	0.9859	0.9552	0.6533	0.6154	0.7406	0.7568
107	1.0846	0.8431	0.7537	0.6885	0.7936	0.8192
108	NaN	NaN	NaN	NaN	NaN	NaN
109	1.1243	0.9491	0.6903	0.803	0.825	0.804
110	1.0415	0.8645	0.6582	0.802	0.8548	0.87
111	1.1184	0.9375	0.7549	0.8379	0.8289	0.8839
112	1.1575	0.9827	0.7368	0.858	0.7926	0.9422
113	1.0742	0.8428	0.7032	0.8019	0.8251	0.8591
114	1.1469	0.9025	0.6917	0.8467	0.8316	0.8736
115	1.0977	0.875	0.7828	0.8417	0.8381	0.9547
116	1.162	0.9415	0.7047	0.9461	0.8711	0.926
117	NaN	NaN	NaN	NaN	NaN	NaN
118	0.9571	0.9829	0.8219	0.9809	0.8556	0.9476
119	1.0719	0.9473	0.8894	1.009	0.9486	1.0167
120	NaN	NaN	NaN	NaN	NaN	NaN
121	1.0882	0.9455	0.882	1.0143	0.8749	0.9611
122	1.1201	0.9336	0.8593	0.975	0.9487	1.0715
123	1.1044	0.9884	0.8352	0.9536	0.9246	0.9594
124	1.1276	0.9681	0.8904	0.9639	0.9889	1.0707
125	1.1371	0.9952	0.8546	0.9231	0.9639	1.0205
126	1.1253	1.0606	0.8475	0.9437	1.0099	1.0084
127	1.07	0.8524	0.8593	0.549	0.9914	0.9878
128	NaN	NaN	NaN	NaN	NaN	NaN
129	1.1281	1.032	0.9476	0.9706	0.9709	1.0728
130	1.1431	1.0589	0.9299	0.9562	1.0238	1.0687
131	1.119	0.983	0.8553	0.9482	1.0194	1.0519
132	1.0055	0.96	0.8671	0.8678	0.9943	1.0337
133	1.1169	0.9988	0.8822	0.966	1.0615	1.1234
134	1.1417	1.0519	0.8738	0.9257	1.034	1.1129
135	1.1146	1.0145	0.8847	0.9822	1.0102	1.0464
136	1.1652	1.1181	0.9101	0.9372	1.0542	1.0628
137	1.1309	1.0194	0.9207	1.0016	1.0194	1.0776
138	NaN	NaN	NaN	NaN	NaN	NaN
139	1.1423	1.0577	0.9141	1.0346	1.0362	1.0449
140	1.159	1.0989	0.9155	1.0831	1.1017	1.1232
