# Supplementary material for: α-Synuclein plasma membrane localization correlates with cellular phosphatidylinositol polyphosphate levels
Source: eLife journal article supplement (doi:10.7554/elife.61951), 2021-02-15
Supplement: supp [file elife-61951-supp-v1.zip › elife_poa_e61951_Figure_2_figure_supplement_2_source_data_1.xlsx]

## Sheet: Pi45P2_NMR_data.txt
Residue-resolved NMR signal attenuation profiles (I/I0) of free (I0) versus PC-PIP2 LUV-bound (I) aSyn at indicated molar ratios
aSyn proline residues without peptide amide resonances have no I/I0 values (NaN).
aSyn residue #	I/I0 @ aSyn:PC-PIP2 = 1:6	I/I0 @ aSyn:PC-PIP2 = 1:13	I/I0 @ aSyn:PC-PIP2 = 1:25	I/I0 @ aSyn:PC-PIP2 = 1:50
1	0.61	0.39	0.15	0
2	0.52	0.33	0.12	0
3	0.6	0.36	0.13	0
4	0.64	0.39	0.15	0
5	0.53	0.31	0.16	0
6	0.55	0.33	0.13	0
7	0.55	0.37	0.17	0
8	0.59	0.39	0.16	0
9	0.54	0.34	0.15	0
10	0.59	0.44	0.25	0
11	0.59	0.39	0.19	0.07
12	0.62	0.49	0.29	0.12
13	0.63	0.5	0.3	0.13
14	0.65	0.52	0.32	0.15
15	0.66	0.56	0.3	0.12
16	0.68	0.61	0.39	0.19
17	0.68	0.54	0.3	0.11
18	0.7	0.58	0.36	0.13
19	0.69	0.58	0.39	0.15
20	0.71	0.58	0.37	0.16
21	0.66	0.54	0.34	0.12
22	0.65	0.53	0.33	0.14
23	0.66	0.55	0.34	0.13
24	0.62	0.52	0.35	0.23
25	0.66	0.53	0.36	0.16
26	0.77	0.65	0.43	0.2
27	0.72	0.59	0.39	0.14
28	0.74	0.61	0.39	0.16
29	0.72	0.61	0.39	0.16
30	0.7	0.6	0.39	0.18
31	0.66	0.56	0.37	0.15
32	0.71	0.6	0.39	0.16
33	0.78	0.63	0.42	0.17
34	0.73	0.64	0.47	0.19
35	0.83	0.68	0.49	0.21
36	0.78	0.74	0.5	0.2
37	0.8	0.73	0.52	0.24
38	0.82	0.74	0.51	0.2
39	0.81	0.74	0.53	0.22
40	0.81	0.74	0.51	0.23
41	0.74	0.65	0.47	0.2
42	0.72	0.62	0.43	0.19
43	0.75	0.71	0.56	0.26
44	0.75	0.68	0.51	0.24
45	0.79	0.76	0.6	0.16
46	0.86	0.75	0.58	0.22
47	0.78	0.71	0.54	0.25
48	0.87	0.78	0.64	0.28
49	0.85	0.79	0.6	0.29
50	0.76	0.67	0.51	0.24
51	0.75	0.65	0.57	0.27
52	0.76	0.68	0.55	0.26
53	0.78	0.75	0.57	0.27
54	0.78	0.74	0.56	0.28
55	0.84	0.81	0.65	0.31
56	0.81	0.8	0.63	0.32
57	0.81	0.78	0.58	0.28
58	0.78	0.74	0.57	0.26
59	0.77	0.75	0.57	0.26
60	0.75	0.7	0.55	0.25
61	0.76	0.72	0.56	0.29
62	0.78	0.74	0.57	0.3
63	0.82	0.79	0.63	0.36
64	0.78	0.74	0.57	0.28
65	0.8	0.8	0.74	0.37
66	0.8	0.79	0.63	0.32
67	0.78	0.76	0.6	0.29
68	0.79	0.84	0.62	0.3
69	0.8	0.78	0.62	0.29
70	0.88	0.91	0.75	0.36
71	0.85	0.87	0.7	0.35
72	0.79	0.76	0.62	0.29
73	0.79	0.78	0.63	0.31
74	0.82	0.81	0.66	0.31
75	0.79	0.77	0.61	0.31
76	0.79	0.78	0.63	0.31
77	0.86	0.88	0.72	0.34
78	0.81	0.8	0.64	0.24
79	0.82	0.82	0.68	0.33
80	0.78	0.75	0.61	0.28
81	0.79	0.77	0.62	0.35
82	0.84	0.83	0.69	0.33
83	0.82	0.81	0.67	0.31
84	0.79	0.78	0.63	0.31
85	0.8	0.78	0.64	0.31
86	0.89	0.78	0.72	0.32
87	0.8	0.77	0.62	0.33
88	0.88	0.88	0.75	0.27
89	0.81	0.81	0.65	0.31
90	0.82	0.82	0.66	0.34
91	0.81	0.8	0.66	0.32
92	0.79	0.77	0.61	0.31
93	0.84	0.78	0.65	0.35
94	0.82	0.78	0.63	0.41
95	0.86	0.86	0.7	0.34
96	0.81	0.78	0.63	0.33
97	0.78	0.74	0.57	0.31
98	0.79	0.77	0.63	0.31
99	0.82	0.79	0.64	0.28
100	0.83	0.83	0.7	0.29
101	0.88	0.79	0.66	0.36
102	0.83	0.84	0.73	0.38
103	0.81	0.83	0.7	0.39
104	0.83	0.81	0.68	0.39
105	0.89	0.84	0.67	0.42
106	0.93	0.85	0.65	0.44
107	0.81	0.8	0.66	0.45
108	NaN	NaN	NaN	NaN
109	0.83	0.85	0.75	0.46
110	0.83	0.84	0.75	0.43
111	0.84	0.85	0.8	0.46
112	0.87	0.94	0.87	0.49
113	0.84	0.87	0.83	0.49
114	0.84	0.84	0.85	0.47
115	0.83	0.86	0.87	0.46
116	0.87	0.89	0.89	0.53
117	NaN	NaN	NaN	NaN
118	0.95	1	0.94	0.59
119	0.86	0.92	0.88	0.61
120	NaN	NaN	NaN	NaN
121	0.89	0.94	0.94	0.71
122	0.88	0.93	0.91	0.67
123	0.89	0.96	0.97	0.72
124	0.88	0.97	0.98	0.64
125	0.83	0.9	0.95	0.83
126	0.88	0.96	0.96	0.84
127	0.75	0.72	0.68	0.51
128	NaN	NaN	NaN	NaN
129	0.86	0.93	0.92	0.75
130	0.88	0.95	0.96	0.84
131	0.91	0.98	0.86	0.86
132	0.9	0.99	0.93	0.8
133	0.92	0.98	1.02	0.77
134	0.9	0.97	0.98	0.81
135	0.88	0.95	0.97	0.91
136	0.89	0.99	1.02	0.85
137	0.89	0.99	1.03	0.92
138	NaN	NaN	NaN	NaN
139	0.89	0.98	1	0.91
140	0.91	0.99	1.07	1.03
