# Supplementary material for: α-Synuclein plasma membrane localization correlates with cellular phosphatidylinositol polyphosphate levels
Source: eLife journal article supplement (doi:10.7554/elife.61951), 2021-02-15
Supplement: supp [file elife-61951-supp-v1.zip › elife_poa_e61951_Figure_2_figure_supplement_3_source_data_1.xlsx]

## Sheet: Pi45P2_CaCl2_data.txt
Residue-resolved NMR signal attenuation profiles (I/I0) of free (I0) versus PC-PIP2 LUV-bound (I) aSyn at indicated molar ratio before and after PLC hydrolysis (+ PLC)
aSyn proline residues without peptide amide resonances have no I/I0 values (NaN).
aSyn residue #	I/I0 @ aSyn:PC-PIP2 = 1:50	I/I0 @ aSyn:PC-PIP2 = 1:50 + PLC
1	0	0.6583
2	0	0.696
3	0	0.7448
4	0	0.5948
5	0	0.5611
6	0	0.6231
7	0	0.4969
8	0	0.5416
9	0	0.6615
10	0	0.6234
11	0.07	0.6003
12	0.12	0.6502
13	0.13	0.6739
14	0.15	0.6976
15	0.12	0.7115
16	0.19	0.6466
17	0.11	0.6819
18	0.13	0.7936
19	0.15	0.7523
20	0.16	0.6811
21	0.12	0.6803
22	0.14	0.829
23	0.13	0.7747
24	0.23	0.8056
25	0.16	0.8386
26	0.2	0.8089
27	0.14	0.6883
28	0.16	0.7825
29	0.16	0.8154
30	0.18	0.7681
31	0.15	0.8425
32	0.16	0.8116
33	0.17	0.8542
34	0.19	0.8119
35	0.21	0.8403
36	0.2	0.7936
37	0.24	0.8279
38	0.2	0.6646
39	0.22	0.6348
40	0.23	0.5729
41	0.2	0.6685
42	0.19	0.7796
43	0.26	0.8301
44	0.24	0.8246
45	0.16	0.8842
46	0.22	0.8828
47	0.25	0.8773
48	0.28	0.8335
49	0.29	0.824
50	0.24	0.767
51	0.27	0.8097
52	0.26	0.8242
53	0.27	0.8479
54	0.28	0.8157
55	0.31	0.8612
56	0.32	0.9033
57	0.28	0.8977
58	0.26	0.7404
59	0.26	0.7514
60	0.25	0.8202
61	0.29	0.8089
62	0.3	0.8278
63	0.36	0.7991
64	0.28	0.8047
65	0.37	0.8464
66	0.32	0.8182
67	0.29	0.7731
68	0.3	0.7625
69	0.29	0.8833
70	0.36	0.8645
71	0.35	0.8811
72	0.29	0.8723
73	0.31	0.8965
74	0.31	0.8955
75	0.31	0.89
76	0.31	0.8069
77	0.34	0.8745
78	0.24	0.8889
79	0.33	0.8689
80	0.28	0.8889
81	0.35	0.8955
82	0.33	0.9279
83	0.31	0.9033
84	0.31	0.9749
85	0.31	0.9454
86	0.32	0.9969
87	0.33	0.9671
88	0.27	0.9106
89	0.31	0.8778
90	0.34	0.8712
91	0.32	0.9749
92	0.31	0.8656
93	0.35	0.9388
94	0.41	0.8656
95	0.34	0.7625
96	0.33	0.7925
97	0.31	0.8434
98	0.31	0.7603
99	0.28	0.8135
100	0.29	0.7437
101	0.36	0.8224
102	0.38	0.706
103	0.39	0.7969
104	0.39	0.7614
105	0.42	0.8407
106	0.44	0.7967
107	0.45	0.7304
108	NaN	NaN
109	0.46	0.8036
110	0.43	0.8088
111	0.46	0.8464
112	0.49	0.7711
113	0.49	0.7891
114	0.47	0.826
115	0.46	0.6883
116	0.53	0.7249
117	NaN	NaN
118	0.59	0.7947
119	0.61	0.6795
120	NaN	NaN
121	0.71	0.6238
122	0.67	0.6575
123	0.72	0.6883
124	0.64	0.6152
125	0.83	0.7215
126	0.84	0.5956
127	0.51	0.7514
128	NaN	NaN
129	0.75	0.7814
130	0.84	0.8113
131	0.86	0.8074
132	0.8	0.8622
133	0.77	0.8457
134	0.81	0.798
135	0.91	0.7016
136	0.85	0.7803
137	0.92	0.7614
138	NaN	NaN
139	0.91	1.0502
140	1.03	0.8324
