# Supplementary material for: α-Synuclein plasma membrane localization correlates with cellular phosphatidylinositol polyphosphate levels
Source: eLife journal article supplement (doi:10.7554/elife.61951), 2021-02-15
Supplement: supp [file elife-61951-supp-v1.zip › elife_poa_e61951_Figure_2_figure_supplement_4_source_data_1.xlsx]

## Sheet: Pi45P2_CaCl2_data.txt
Residue-resolved NMR signal attenuation profiles (I/I0) of free (I0) versus PC-PIP2 LUV-bound (I) aSyn at indicated molar ratio without and with addition of 2.5 mM Ca2+
aSyn proline residues without peptide amide resonances have no I/I0 values (NaN).
aSyn residue #	I/I0 @ aSyn:PC-PIP2 = 1:50	I/I0 @ aSyn:PC-PIP2 = 1:50 + 2.5 mM Ca2+
1	0	0.3107
2	0	0.2491
3	0	0.2623
4	0	0.2559
5	0	0.2651
6	0	0.2534
7	0	0.2745
8	0	0.308
9	0	0.2895
10	0	0.3729
11	0.07	0.4636
12	0.12	0.4558
13	0.13	0.4604
14	0.15	0.4448
15	0.12	0.4199
16	0.19	0.4233
17	0.11	0.4068
18	0.13	0.5561
19	0.15	0.536
20	0.16	0.4616
21	0.12	0.4042
22	0.14	0.5688
23	0.13	0.5417
24	0.23	0.5753
25	0.16	0.6011
26	0.2	0.6435
27	0.14	0.6213
28	0.16	0.6168
29	0.16	0.6279
30	0.18	0.6452
31	0.15	0.579
32	0.16	0.6002
33	0.17	0.5906
34	0.19	0.5726
35	0.21	0.5756
36	0.2	0.5891
37	0.24	0.606
38	0.2	0.6048
39	0.22	0.6389
40	0.23	0.6011
41	0.2	0.6768
42	0.19	0.733
43	0.26	0.6749
44	0.24	0.7799
45	0.16	0.7804
46	0.22	0.7982
47	0.25	0.8177
48	0.28	0.8436
49	0.29	0.8723
50	0.24	0.803
51	0.27	0.8159
52	0.26	0.8122
53	0.27	0.8096
54	0.28	0.7956
55	0.31	0.9061
56	0.32	0.8188
57	0.28	0.7744
58	0.26	0.6979
59	0.26	0.7819
60	0.25	0.8071
61	0.29	0.8303
62	0.3	0.8305
63	0.36	0.7523
64	0.28	0.7938
65	0.37	0.8553
66	0.32	0.8905
67	0.29	0.8644
68	0.3	0.8996
69	0.29	0.9022
70	0.36	0.9153
71	0.35	0.8461
72	0.29	0.8162
73	0.31	0.8174
74	0.31	0.8254
75	0.31	0.8787
76	0.31	0.8449
77	0.34	0.8383
78	0.24	0.9127
79	0.33	0.8318
80	0.28	0.7385
81	0.35	0.8605
82	0.33	0.9492
83	0.31	0.8188
84	0.31	0.884
85	0.31	0.9022
86	0.32	0.9336
87	0.33	0.9648
88	0.27	1
89	0.31	0.7606
90	0.34	0.8422
91	0.32	0.8892
92	0.31	0.9205
93	0.35	0.7255
94	0.41	0.8553
95	0.34	0.7246
96	0.33	0.7164
97	0.31	0.9166
98	0.31	0.7625
99	0.28	0.7929
100	0.29	0.7744
101	0.36	0.7237
102	0.38	0.8709
103	0.39	0.8527
104	0.39	0.8344
105	0.42	0.8403
106	0.44	0.8326
107	0.45	0.7689
108	NaN	NaN
109	0.46	0.9543
110	0.43	0.9752
111	0.46	0.983
112	0.49	1.0104
113	0.49	0.841
114	0.47	0.8783
115	0.46	0.7772
116	0.53	0.7339
117	NaN	NaN
118	0.59	0.7468
119	0.61	0.7975
120	NaN	NaN
121	0.71	0.7865
122	0.67	0.8371
123	0.72	0.8996
124	0.64	0.824
125	0.83	0.8227
126	0.84	0.7758
127	0.51	0.8285
128	NaN	NaN
129	0.75	0.8853
130	0.84	0.9609
131	0.86	0.8894
132	0.8	0.8996
133	0.77	0.9797
134	0.81	1.0313
135	0.91	0.9766
136	0.85	1.0209
137	0.92	0.9987
138	NaN	NaN
139	0.91	1.1355
140	1.03	1.0952
