# Supplementary material for: α-Synuclein plasma membrane localization correlates with cellular phosphatidylinositol polyphosphate levels
Source: eLife journal article supplement (doi:10.7554/elife.61951), 2021-02-15
Supplement: supp [file elife-61951-supp-v1.zip › elife_poa_e61951_Figure_3_figure_supplement_1_source_data_1.xlsx]

## Sheet: Sheet1
Quantification of #aSyn Puncta/Cell at PM upon Histamine treatment_ TIRF Microscopy
Cell Name	SK-MEL-2
aSyn Puncta/Cell	Norm.#	Norm.#
Time	0 s	85 s			Statistical Significance: Calculated for the whole data set.
	0.064864	0.16778
	0.16986	0.17217			Star Values : NS > 0.05; ∗P < 0.05; ∗∗P < 0.01; ∗∗∗P < 0.001.
	0.05173	0.46109
	0.055143	0.12172			Student's t test
	0.051525	0.83575
	0.070067	0.55143			Comparison		t-Value	Star
	0.020141	0.37818			0 s vs 85 s		< 0.0001	***
	0.076408	0.32176
	0.1318	0.73047
	0.11439	0.97216
	0.13831	0.093693
	0.16113	0.71451
	0.22809	0.53539
	0	0.23442
	0.011967	0.97184
	0.066047	0.21611
	0.093791	1
	0.079077	0.12721
	0.095127	0.74853
		0.33203
