# Supplementary material for: α-Synuclein plasma membrane localization correlates with cellular phosphatidylinositol polyphosphate levels
Source: eLife journal article supplement (doi:10.7554/elife.61951), 2021-02-15
Supplement: supp [file elife-61951-supp-v1.zip › elife_poa_e61951_Figure_3_figure_supplement_1_source_data_3.xlsx]

## Sheet: aSyn 
Quantification of #aSyn Puncta/Cell at PM upon Insulin treatment_ TIRF Microscopy
Cell Name	SK-MEL-2
aSyn Puncta/Cell	Norm.#	Norm.#
Time	0 min	10 min			Statistical Significance: Calculated for the whole data set.
	0.072572	1
	0.31804	0.3682			Star Values : NS > 0.05; ∗P < 0.05; ∗∗P < 0.01; ∗∗∗P < 0.001.
	0.46531	0.22199
	0.11526	0.29082			Student's t test
	0.093917	0.46019
	0.16222	0.33013			Comparison		t-Value	Star
	0.010672	0.13074			0 min vs 10 min		< 0.0016	**
	0.24867	0.24333
	0.41409	0.78549
	0.1302	0.10245
	0.22412	0.14941
	0.093917	0.31057
	0.26147	0.085379
	0.11953	0.91996
	0.057631	0.11028
	0.021345	0.44931
	0.21451	0.31003
	0.078975	0.07862
	0	0.27108
	0.18783	0.18997
	0.13874	0.13447
	0.33298	0.60477
		0.55603
		0.36855
		0.42263
		0.23266
		0.15261
		0.080043
		0.21878
		0.46816
		0.33725
		0.15582
		0.11313
		0.92423
