# Supplementary material for: α-Synuclein plasma membrane localization correlates with cellular phosphatidylinositol polyphosphate levels
Source: eLife journal article supplement (doi:10.7554/elife.61951), 2021-02-15
Supplement: supp [file elife-61951-supp-v1.zip › elife_poa_e61951_Figure_3_source_data_1.xlsx]

## Sheet: aSyn Intensity
Quantification of aSyn Intensity/Cell at PM in Phosphatase transfected cells_ Confocal Microscopy
Cell Name	A2780
aSyn Intensity	[a.u]	[a.u]	[a.u]	[a.u]
PIP Phosphatases	mCherry-ctrl.	MTM1	INPP5E	PTEN
	0.20956	0.08098	0.031281	0.099119
	0.21185	0.098482	0.03881	0.15994			Statistical Significance: Calculated for the whole data set.
	0.21519	0.16196	0.043368	0.17061
	0.22313	0.23027	0.049742	0.25009			Star Values : NS > 0.05; ∗P < 0.05; ∗∗P < 0.01; ∗∗∗P < 0.001.
	0.23283	0.28034	0.062203	0.25748
	0.23633	0.30864	0.073195	0.25924			One Way ANOVA
	0.24484	0.33812	0.077328	0.26544
	0.28762	0.34752	0.079697	0.29923			Bonferroni's All Pairs Comparison
	0.30696	0.35754	0.10477	0.29958
	0.33222	0.36152	0.11002	0.30102			Comparison		P-Value	Star
	0.33312	0.36414	0.11864	0.32731			mCherry vs MTM1		0.6297	NS
	0.35071	0.36969	0.12128	0.32859			mCherry vs INPP5E		< .0001	***
	0.37119	0.37454	0.14023	0.33067			mCherry vs PTEN		0.0198	*
	0.38552	0.38202	0.14982	0.33073
	0.38718	0.38337	0.15099	0.34178
	0.39216	0.41853	0.15112	0.35721
	0.3976	0.42373	0.16167	0.37531
	0.40865	0.43613	0.18439	0.3854
	0.42685	0.43844	0.18663	0.39068
	0.4297	0.44027	0.19449	0.39948
	0.43645	0.44993	0.19685	0.40324
	0.44801	0.45643	0.21624	0.40706
	0.44916	0.47745	0.24528	0.41277
	0.45683	0.4781	0.25055	0.41445
	0.4662	0.50428	0.2673	0.41456
	0.49272	0.5069	0.28709	0.41994
	0.50585	0.5086	0.29395	0.42528
	0.51703	0.5141	0.29425	0.42796
	0.52932	0.51863	0.30157	0.44681
	0.5308	0.5234	0.31162	0.45111
	0.56154	0.52611	0.32003	0.47014
	0.56265	0.54167	0.32075	0.47322
	0.56787	0.54687	0.33691	0.47399
	0.57203	0.56137	0.34694	0.47522
	0.57476	0.56449	0.36725	0.49151
	0.59842	0.56532	0.37308	0.49239
	0.60701	0.56895	0.37561	0.50304
	0.63313	0.57805	0.37689	0.53203
	0.64642	0.57808	0.39526	0.5342
	0.65262	0.59671	0.39985	0.53843
	0.66286	0.60078	0.41285	0.54736
	0.66524	0.6149	0.41423	0.55049
	0.68134	0.61786	0.43943	0.55389
	0.68602	0.63056	0.45179	0.55758
	0.69	0.6467	0.46104	0.55759
	0.71663	0.6938	0.46613	0.55855
	0.72245	0.69473	0.47217	0.57936
	0.74591	0.71121	0.47652	0.61175
	0.7475	0.72684	0.50082	0.63098
	0.74826	0.72728	0.50897	0.63526
	0.77033	0.72774	0.51831	0.64532
	0.77327	0.75056	0.52001	0.66667
	0.81747	0.75101	0.53453	0.68856
	0.82103	0.76829	0.53961	0.70516
	0.83566	0.77371	0.55481	0.71419
	0.84465	0.77688	0.55514	0.71441
	0.8586	0.7803	0.56082	0.72461
	0.86042	0.81218	0.56876	0.74416
	0.87689	0.83245	0.57288	0.76041
	0.88846	0.84111	0.57792	0.76627
	0.89235	0.84629	0.58157	0.76884
	0.8954	0.85157	0.591	0.79184
	0.9025	0.87358	0.59145	0.80814
	0.93253	0.87368	0.59304	0.83269
	0.93985	0.87493	0.59358	0.8588
	0.94687	0.89155	0.59787	0.86888
	0.95595	0.91278	0.60185	0.87183
	0.97031	0.91667	0.62059	0.90013
	0.97106	0.93263	0.62067	0.91754
	0.97951	0.93423	0.62569	0.92094
	0.98854	0.93871	0.63101	0.93218
	0.99207	0.98256	0.63986	0.93952
	1.0023	1.0075	0.64252	0.94462
	1.0142	1.0315	0.64417	0.955
	1.0157	1.0674	0.64436	0.96123
	1.0179	1.1085	0.67141	0.99547
	1.0317	1.1287	0.69558	1.021
	1.0575	1.1463	0.69674	1.0425
	1.0667	1.1622	0.69743	1.0486
	1.0756	1.1755	0.71354	1.0665
	1.0929	1.2163	0.72039	1.0892
	1.0954	1.2402	0.7499	1.1082
	1.1013	1.2858	0.75536	1.1112
	1.1385	1.3233	0.7632	1.1136
	1.1385	1.3419	0.79369	1.1184
	1.1497	1.4073	0.79826	1.1261
	1.1686	1.4081	0.84241	1.1347
	1.1709	1.4319	0.91146	1.141
	1.1733	1.4408	0.92385	1.1622
	1.1763	1.4865	0.9323	1.1948
	1.1835	1.5052	0.93536	1.1968
	1.2558	1.5791	0.94986	1.2168
	1.2689	1.5937	0.97033	1.2555
	1.2749	1.5963	0.97554	1.2561
	1.2784	1.6516	0.98841	1.2602
	1.2898	1.6845	1.0271	1.2978
	1.3001	1.787	1.1558	1.3016
	1.3225	1.8395	1.2395	1.3404
	1.367	1.947	1.2599	1.3464
	1.3714	2.0044	1.4136	1.358
	1.3756	2.0431	1.4192	1.364
	1.4018	2.3147	1.4689	1.3826
	1.4549	2.3992	1.5256	1.4096
	1.5224	2.4047	1.5332	1.4377
	1.5825		1.6836	1.5407
	1.6729			1.5785
	1.699			1.6453
	1.7432			1.6588
	1.7671			1.7323
	1.7874			1.8444
	1.9548			1.9045
	2.0452
	2.0505
	2.1246
	2.1433
	2.2575
	2.4102
	2.6573
	2.8289
	2.9386
	2.9503
