# Supplementary material for: α-Synuclein plasma membrane localization correlates with cellular phosphatidylinositol polyphosphate levels
Source: eLife journal article supplement (doi:10.7554/elife.61951), 2021-02-15
Supplement: supp [file elife-61951-supp-v1.zip › elife_poa_e61951_Figure_3_source_data_2.xlsx]

## Sheet: Intensity
Quantification of aSyn, PIP2 and PIP3 Intensity/Cell at PM upon Histamine treatment_ Confocal Microscopy
Cell Name	SK-MEL-2
aSyn Intensity	[a.u]	[a.u]	[a.u]	[a.u]	[a.u]		PI(4,5)P2 Intensity	[a.u]	[a.u]	[a.u]	[a.u]	[a.u]		PI(3,4,5)P3 Intensity	[a.u]	[a.u]	[a.u]	[a.u]	[a.u]
Time	0 s	40 s	85 s	120 s	240 s		Time	0 s	40 s	85 s	120 s	240 s		Time	0 s	40 s	85 s	120 s	240 s
	0.3328	0.624	0.5662	0.6232	0.3934			0.2294	0.373	0.4927	0.2416	0.168			0.168	0.1954	0.1734	0.3142	0.195
	0.3346	0.7296	0.5696	0.6246	0.4152			0.2606	0.4913	0.5463	0.2677	0.4293			0.1874	0.1452	0.2074	0.333	0.2106
	0.349	0.7424	0.5876	0.6868	0.427			0.2813	0.6966	0.6001	0.3092	0.4932			0.1996	0.1662	0.2262	0.3422	0.2134
	0.3502	0.7598	0.5936	0.7338	0.4312			0.3982	0.7005	0.6071	0.3214	0.5619			0.2436	0.2014	0.2642	0.3718	0.216
	0.3742	0.7756	0.6024	0.7426	0.4636			0.4787	0.7859	0.6592	0.3412	0.6102			0.2446	0.2394	0.28	0.373	0.2204
	0.3816	0.8318	0.6074	0.7984	0.4738			0.5439	0.8067	0.6633	0.3412	0.7116			0.2472	0.256	0.283	0.3814	0.2242
	0.3892	0.8348	0.618	0.8066	0.4798			0.6411	0.8834	0.6968	0.3966	0.7145			0.3122	0.3088	0.3288	0.3848	0.2296
	0.4088	0.855	0.6542	0.8108	0.4806			0.7857	1.1	0.7637	0.4005	0.7488			0.3446	0.314	0.3338	0.3988	0.2556
	0.446	0.857	0.6758	0.8122	0.4944			0.8062	1.3887	0.7853	0.4287	0.7574			0.3592	0.3508	0.3648	0.4038	0.2564
	0.4902	0.8694	0.6758	0.8332	0.5116			0.8259	1.5986	0.7963	0.444	0.7636			0.3596	0.4074	0.3958	0.4192	0.2932
	0.498	0.871	0.6828	0.906	0.5206			0.8453	1.8059	0.8112	0.4594	0.8018			0.3626	0.4164	0.4182	0.422	0.3074
	0.5506	0.8726	0.7342	0.9132	0.5264			0.9277	2.1254	0.8165	0.482	0.8155			0.4092	0.4196	0.4914	0.4332	0.3094
	0.558	0.875	0.755	0.962	0.5716			0.9624	2.3466	0.8642	0.4855	0.8199			0.4258	0.443	0.5414	0.4562	0.3206
	0.5768	0.8924	0.7608	0.9626	0.5824			1.0399	2.4451	0.8787	0.505	0.838			0.4322	0.445	0.5422	0.4722	0.3252
	0.5772	0.9442	0.797	0.963	0.6034			1.0893	1.2853	0.8803	0.52	0.8712			0.4424	0.4954	0.545	0.4804	0.3352
	0.5964	0.9518	0.8112	0.9632	0.6098			1.164	1.3402	0.9033	0.5565	0.9285			0.4472	0.5052	0.5496	0.4854	0.3446
	0.606	0.955	0.8264	0.9844	0.6102			1.1775	1.5493	0.9295	0.5789	0.9652			0.4612	0.511	0.5652	0.5194	0.3482
	0.6386	0.9644	0.844	0.9902	0.6118			1.2413	1.7126	0.9562	0.583	0.9965			0.4724	0.5632	0.5778	0.5216	0.3524
	0.646	0.9678	0.8892	1.022	0.6476			1.2647	1.7809	1.0434	0.6086	1.013			0.4862	0.5828	0.578	0.5348	0.3624
	0.7274	0.9754	0.891	1.0326	0.6586			1.4699	1.8536	1.0789	0.667	1.0441			0.4896	0.6	0.612	0.5366	0.3866
	0.7448	0.9884	0.8964	1.0562	0.663			1.5084	2.0228	1.0835	0.6926	1.0974			0.5082	0.6054	0.6248	0.5392	0.4068
	0.762	0.9992	0.8998	1.1136	0.6948			1.5125	2.2284	1.0965	0.7031	1.0976			0.509	0.6108	0.6998	0.5452	0.4324
	0.68072	1.011	0.9018	1.1172	0.7194			1.6151	2.5595	1.1083	0.7151	1.2211			0.561	0.633	0.7336	0.5464	0.442
	0.74304	1.017	0.9048	1.1442	0.7408			1.7261	2.6305	1.1187	0.7227	1.3568			0.5954	0.6346	0.7484	0.5484	0.498
	0.39282	1.0208	0.9236	1.206	0.7972			1.8444	2.7479	1.1266	0.8554	1.3725			0.6808	0.6364	0.7724	0.5664	0.5242
	0.5268	1.04	0.9344	1.2086	0.8216			1.8759	3.2477	1.1746	0.9058	1.3931			0.7664	0.6536	0.8214	0.604	0.529
	0.6624	1.0428	0.9544	1.3454	0.8432			2.0848	3.3892	1.1747	0.4814	1.4137			0.8176	0.676	0.8482	0.6134	0.558
	0.449	1.0444	0.964	1.362	0.8436			2.1076	3.9564	1.1937	0.26343	1.4644			0.8286	0.6886	0.8798	0.6282	0.613
	0.3378	1.0596	0.9666	1.4594	0.8512			2.1147	3.4794	1.2301	0.36097	1.6031			0.8582	0.6988	0.891	0.6358	0.6432
	0.622	1.0684	0.986	1.4676	0.8612			2.1337	3.53	1.3085	0.82733	1.7483			1.328	0.7588	0.9684	0.6794	0.725
	0.3934	1.0684	0.9932	1.496	0.864			2.2162	2.1676	1.3161	0.28807	2.0949			1.635	0.7624	0.9696	0.713	0.7546
	0.468	1.1	1.003	1.506	0.866			2.2499	2.2561	1.3724	0.21229	2.2377			1.7892	0.8026	0.9778	0.713	0.7786
	0.572	1.1074	1.0268	1.5564	0.87			0.73826	1.858	1.4399	0.21423	2.3156			0.3006	0.8448	1.0522	0.7158	0.9544
	0.4168	1.1142	1.0422	1.7622	0.881			0.9019	1.8631	1.5008	0.18114	2.4447			0.665	0.8558	1.0746	0.7802	1.3102
	0.32736	1.1332	1.0602	1.9256	0.8826			1.9445	2.1686	1.5436	0.18928	2.8496			0.2194	0.8678	1.0948	0.8152	1.3476
	0.28304	1.1778	1.0676	1.9266	0.9328			2.2334	2.2374	1.5812	0.45901	3.3408			1.6628	0.885	1.0992	0.8198	1.437
	0.72742	1.1852	1.0836	2.1418	0.9708			1.727	1.172	1.6593	0.28483	3.5009			0.6766	0.912	1.1014	0.8226	1.5472
	0.38162	1.1952	1.089	0.1325	1.0024			1.8169	1.5161	1.6742	0.24246	3.4455			0.7468	0.9684	1.1142	0.829	1.5596
	0.55052	1.2096	1.0922	0.16122	1.0398			0.97317	1.3523	1.7279	0.55201	3.5541			0.6274	0.9792	1.1376	0.8562	1.8718
	0.32272	1.2136	1.2222	0.18538	1.0664			1.6203	2.0706	1.7546	0.36286	3.5369			0.5434	1.0038	1.1682	0.8702	2.3038
	0.40888	1.2768	1.2222	0.22374	1.0912			0.74656	1.1031	1.8914	0.3298	1.4802			0.6966	1.0264	1.1736	0.8852	0.3898
	0.55806	1.2796	1.2258	0.2643	1.1522			0.59677	1.6274	2.0279	0.2543	1.126			1.4262	1.064	1.2872	0.9102	0.561
	0.57726	1.3182	1.2394	0.26572	1.1646			0.75774	1.5637	2.0998	0.26907	0.84866			0.2914	1.2584	1.4676	0.9164	0.5158
	0.49026	1.3372	1.253	0.38478	1.1832			0.93783	1.1815	2.215	0.32358	1.0599			0.5102	1.5848	1.4888	0.9318	0.4748
	0.76208	1.3422	1.2556	0.431	1.1898			0.71801	2.7374	2.2713	0.20054	0.92726			0.362	1.7374	1.4984	1.014	1.2302
	0.21726	1.3478	1.267	0.431	1.2552			1.1278	2.6315	2.3631	0.35733	0.27568			0.4258	1.76	1.8134	1.0156	1.2494
	0.27574	1.348	1.2678	0.60728	1.4264			0.87325	1.5069	2.9157	0.30775	0.60281			0.8176	1.7696	2.1042	1.0166	1.3806
	0.26574	1.3546	1.287	0.6232	1.4766			0.72798	0.8884	3.0798	0.31756	3.128			0.4996	1.7772	2.4682	1.0322	1.4506
	0.3082	1.376	1.301	0.62454	1.648			1.0076	2.3459	3.0869	0.36374	2.4845			0.2244	1.8382	2.5238	1.0932	0.8314
	0.2211	1.4054	1.32	0.68686	0.93276			0.71935	1.7073	3.376	0.3962	2.4333			1.7686	2.1688	2.689	1.211	0.4034
	0.29912	1.4072	1.3638	0.79844	0.88268			0.91034	1.0693	3.8742	0.49284	2.2475			0.605	2.6472	2.924	1.2558	0.5824
	0.49802	1.4108	1.3732	0.80662	0.866			0.83978	1.1138	4.4242	0.49156	3.0354			0.3748	2.8062	2.9272	1.3306	0.9836
	0.57672	1.4126	1.4268	0.81076	0.86394			1.0156	1.1222	0.9226	0.37943	2.2848			0.4128	3.4358	0.6272	1.335	1.2374
	0.32664	1.4324	1.525	0.81222	0.85122			1.561	1.8283	1.1196	0.48105	2.2411			0.2508	0.5226	0.6364	1.5722	0.5404
	0.33274	1.474	1.5696	0.83328	0.8436			1.6375	1.0052	0.87914	0.4526	1.024			0.674	0.342	0.499	1.6408	0.5786
	0.5964	1.515	1.5908	0.96204	0.84312			1.5874	1.0951	1.3274	0.50295	0.93849			0.3656	0.5058	0.2958	1.8126	1.1424
	0.63858	1.518	1.595	0.96304	0.82154			0.90271	1.339	1.0489	0.55037	1.073			0.3352	1.235	0.973	2.0732	1.2298
	0.44602	1.5336	1.643	1.03258	0.79728			0.96198	1.8009	0.89005	0.42365	0.89078			0.214	0.618	0.525	2.0804	0.7474
	0.33464	1.5438	1.6498	1.20602	0.71946			1.5887	2.7375	1.1959	0.51809	0.8549			0.1878	1.7248	0.3906	2.1622	0.5594
	0.35012	1.5892	1.6694	1.36196	0.6948			1.4921	2.3592	0.88061	0.79684	0.42582			0.3188	1.634	0.8546	2.3642
	0.60598	1.6144	1.7274	1.506	0.6631			0.85043	2.1549	1.0895	0.71284	1.0069			0.356	1.1156	1.074	2.7298
	0.34908	1.6928	1.7372	1.55642	0.65856			1.0342	1.3121	1.0123	0.58493	1.282			1.0668	0.6634	2.3518	3.1052
	0.38924	1.7386	1.76	1.9256	0.61176			0.85244	1.3213	1.2046	0.82472	0.96822			1.314	1.2006	2.076	3.12
	0.64594	1.8662	1.766	1.92652	0.61012			0.90761	2.0936	1.8012	0.49543	1.3597			1.5798	0.476	1.9376	1.1218
	0.37428	1.8838	1.7822	0.14372	0.60974			0.92018	1.1932	1.8849	0.57865	1.3835			1.4658	0.5276	2.6412	1.292
	0.74482	2.1302	1.7856	0.2729	0.60348			0.98051	1.2916	2.6742	0.59791	1.0125				0.5376	1.496	1.8212
	0.25514	2.223	1.818	0.43852	0.58248			0.91169	1.5583	1.8301	0.38983	1.2505				2.1734	1.0526	1.7322
	0.2336	2.393	1.8852	0.89884	0.52642			0.98058	2.0636	1.0812	0.84928	1.0538				2.5216	1.3348	1.1218
	0.25714	2.7142	1.9752	0.17096	0.52064			0.69501	3.088	1.146	1.1967	0.68093				0.8304	1.0936	1.1144
	0.70766	2.9154	2.0272	0.1553	0.5116			0.81856	3.4814	1.8315	0.35136	1.3909				0.85	1.5662	1.0164
	0.56664		2.0798	0.1826	0.49434			0.75365		1.7258	0.28514	1.4618					1.2232	0.5042
	0.53234		2.1214	0.33174	0.48066			0.7456		1.024	0.2833	1.0636					0.59	1.3336
	0.49708		2.1648	0.26638	0.47982			0.66468		1.225	0.27992	0.88117					1.2406	1.3658
	0.42278		2.2026	0.22216	0.47374			0.59688		1.0262	0.22892	1.0918					1.3912
	0.67566		2.2072	0.37416	0.46352			1.5078		1.0865	0.17072	0.94708					1.502
	0.34796		2.3506	0.79544	0.43126			1.4742		1.1003		1.3377					1.038
			2.3824	0.34882	0.42694					1.1663		0.77534					1.0194
			2.3826		0.41524					1.091		1.3817					0.4536
			2.4034		0.39344					1.1663		1.0731					1.096
			2.429		0.38846					2.4508		1.7063					1.2558
			2.4528		0.38254					0.85399		1.1753					1.1884
			2.5872		0.3654					0.98912		1.9612					1.44
			2.5874		0.3645					0.91812		1.2633
			2.6366							0.90932		0.9888
			2.683							0.82081
			3.0016							0.74665
			3.4998							1.743

## Sheet: ANOVA
aSyn Intensity							PI(4,5)P2 Intensity							PI(3,4,5)P3 Intensity
Statistical Significance: Calculated for the whole data set.						Statistical Significance: Calculated for the whole data set.								Statistical Significance: Calculated for the whole data set.
Star Values : NS > 0.05; ∗P < 0.05; ∗∗P < 0.01; ∗∗∗P < 0.001.						Star Values : NS > 0.05; ∗P < 0.05; ∗∗P < 0.01; ∗∗∗P < 0.001.								Star Values : NS > 0.05; ∗P < 0.05; ∗∗P < 0.01; ∗∗∗P < 0.001.
One Way ANOVA						One Way ANOVA								One Way ANOVA
Bonferroni's All Pairs Comparison						Bonferroni's All Pairs Comparison								Bonferroni's All Pairs Comparison
Comparison	P-Value	Star				Comparison	P-Value	Star						Comparison	P-Value	Star
0 s vs 40 s	< .0001	***				0 s vs 40 s	< .0001	***						0 s vs 40 s	0.0207	*
0 s vs 85 s	< .0001	***				0 s vs 85 s	0.1971	NS						0 s vs 85 s	0.0001	***
0 s vs 120 s	< .0001	***				0 s vs 120 s	< .0001	***						0 s vs 120 s	0.0042	**
0 s vs 240 s	< .0001	***				0 s vs 240 s	0.2264	NS						0 s vs 240 s	1	NS
