# Supplementary material for: α-Synuclein plasma membrane localization correlates with cellular phosphatidylinositol polyphosphate levels
Source: eLife journal article supplement (doi:10.7554/elife.61951), 2021-02-15

Endogenous  $\alpha$ Syn concentration increases during differentiation of SH-SY5Y cells

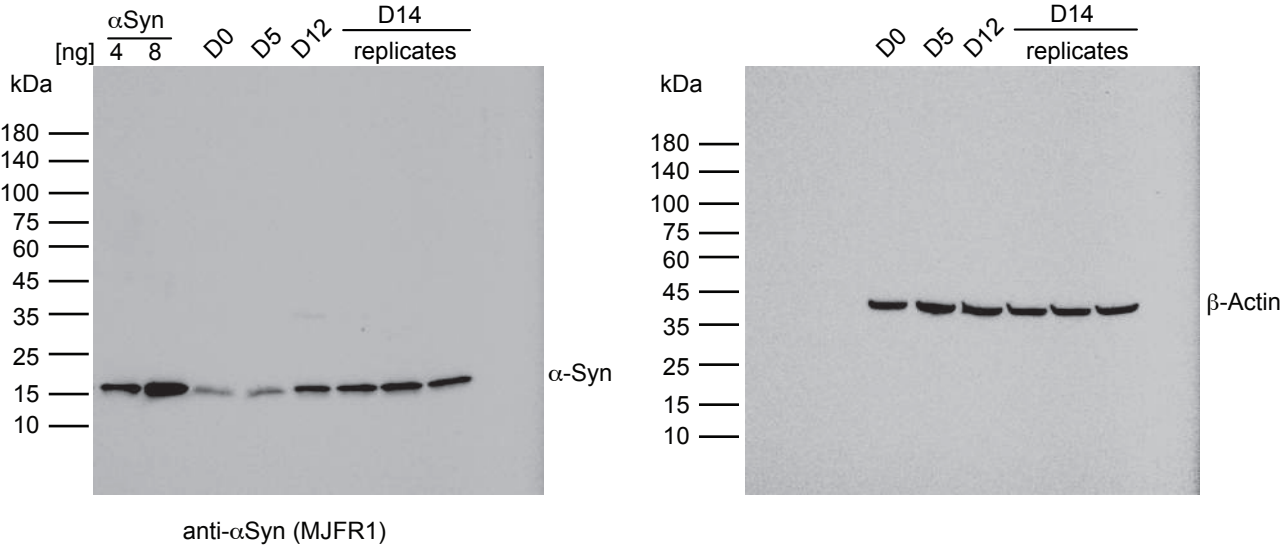

Supplement: supp [file elife_poa_e61951_Figure_1_figure_supplement_1_source_data_2.pdf › elife_poa_e61951_Figure_1_figure_supplement_1_source_data_2.pdf]
