# Supplementary material for: α-Synuclein plasma membrane localization correlates with cellular phosphatidylinositol polyphosphate levels
Source: eLife journal article supplement (doi:10.7554/elife.61951), 2021-02-15

Endogenous  $\alpha$ Syn levels in commonly used human cell lines

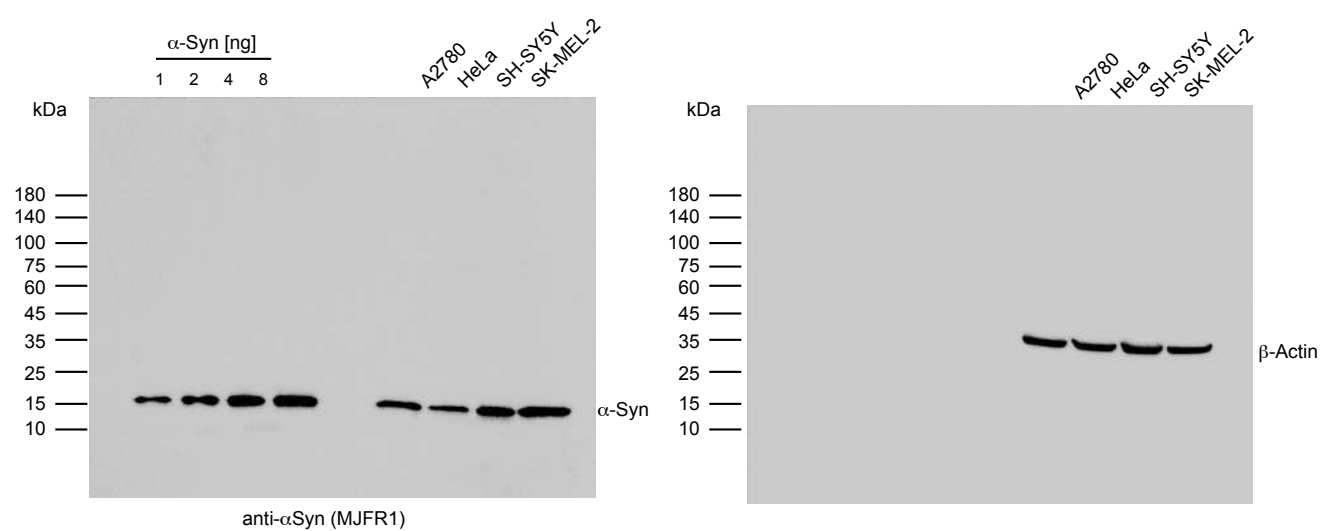

Supplement: supp [file elife_poa_e61951_Figure_1_figure_supplement_2_source_data_3.pdf › elife_poa_e61951_Figure_1_figure_supplement_2_source_data_3.pdf]
