# Supplementary material for: α-Synuclein plasma membrane localization correlates with cellular phosphatidylinositol polyphosphate levels
Source: eLife journal article supplement (doi:10.7554/elife.61951), 2021-02-15

Endogenous insulin like growth factor receptor  $\beta$  (IGF-R $\beta$ ) in SK-MEL-2 and HEK 293 cells

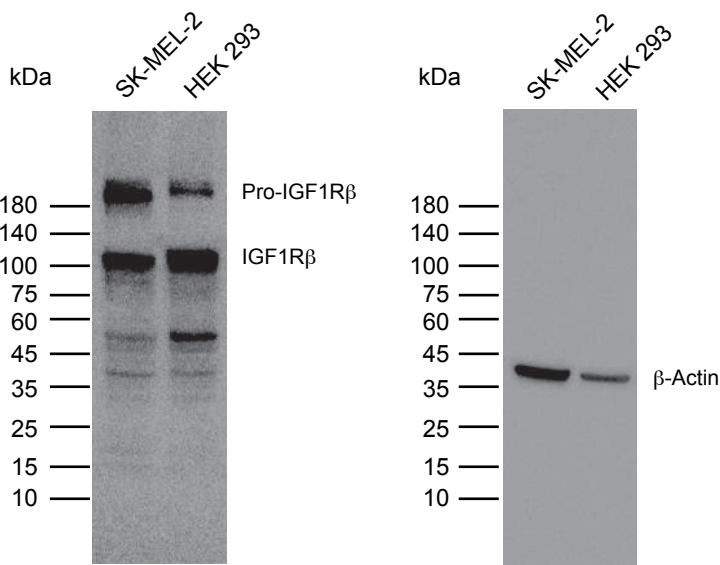

Supplement: supp [file elife_poa_e61951_Figure_3_figure_supplement_1_source_data_2.pdf › elife_poa_e61951_Figure_3_figure_supplement_1_source_data_2.pdf]
