# Supplementary figures and images for: α-Synuclein plasma membrane localization correlates with cellular phosphatidylinositol polyphosphate levels
Source: eLife journal article supplement (doi:10.7554/elife.61951), 2021-02-15

Figure 1 - figure supplement 1

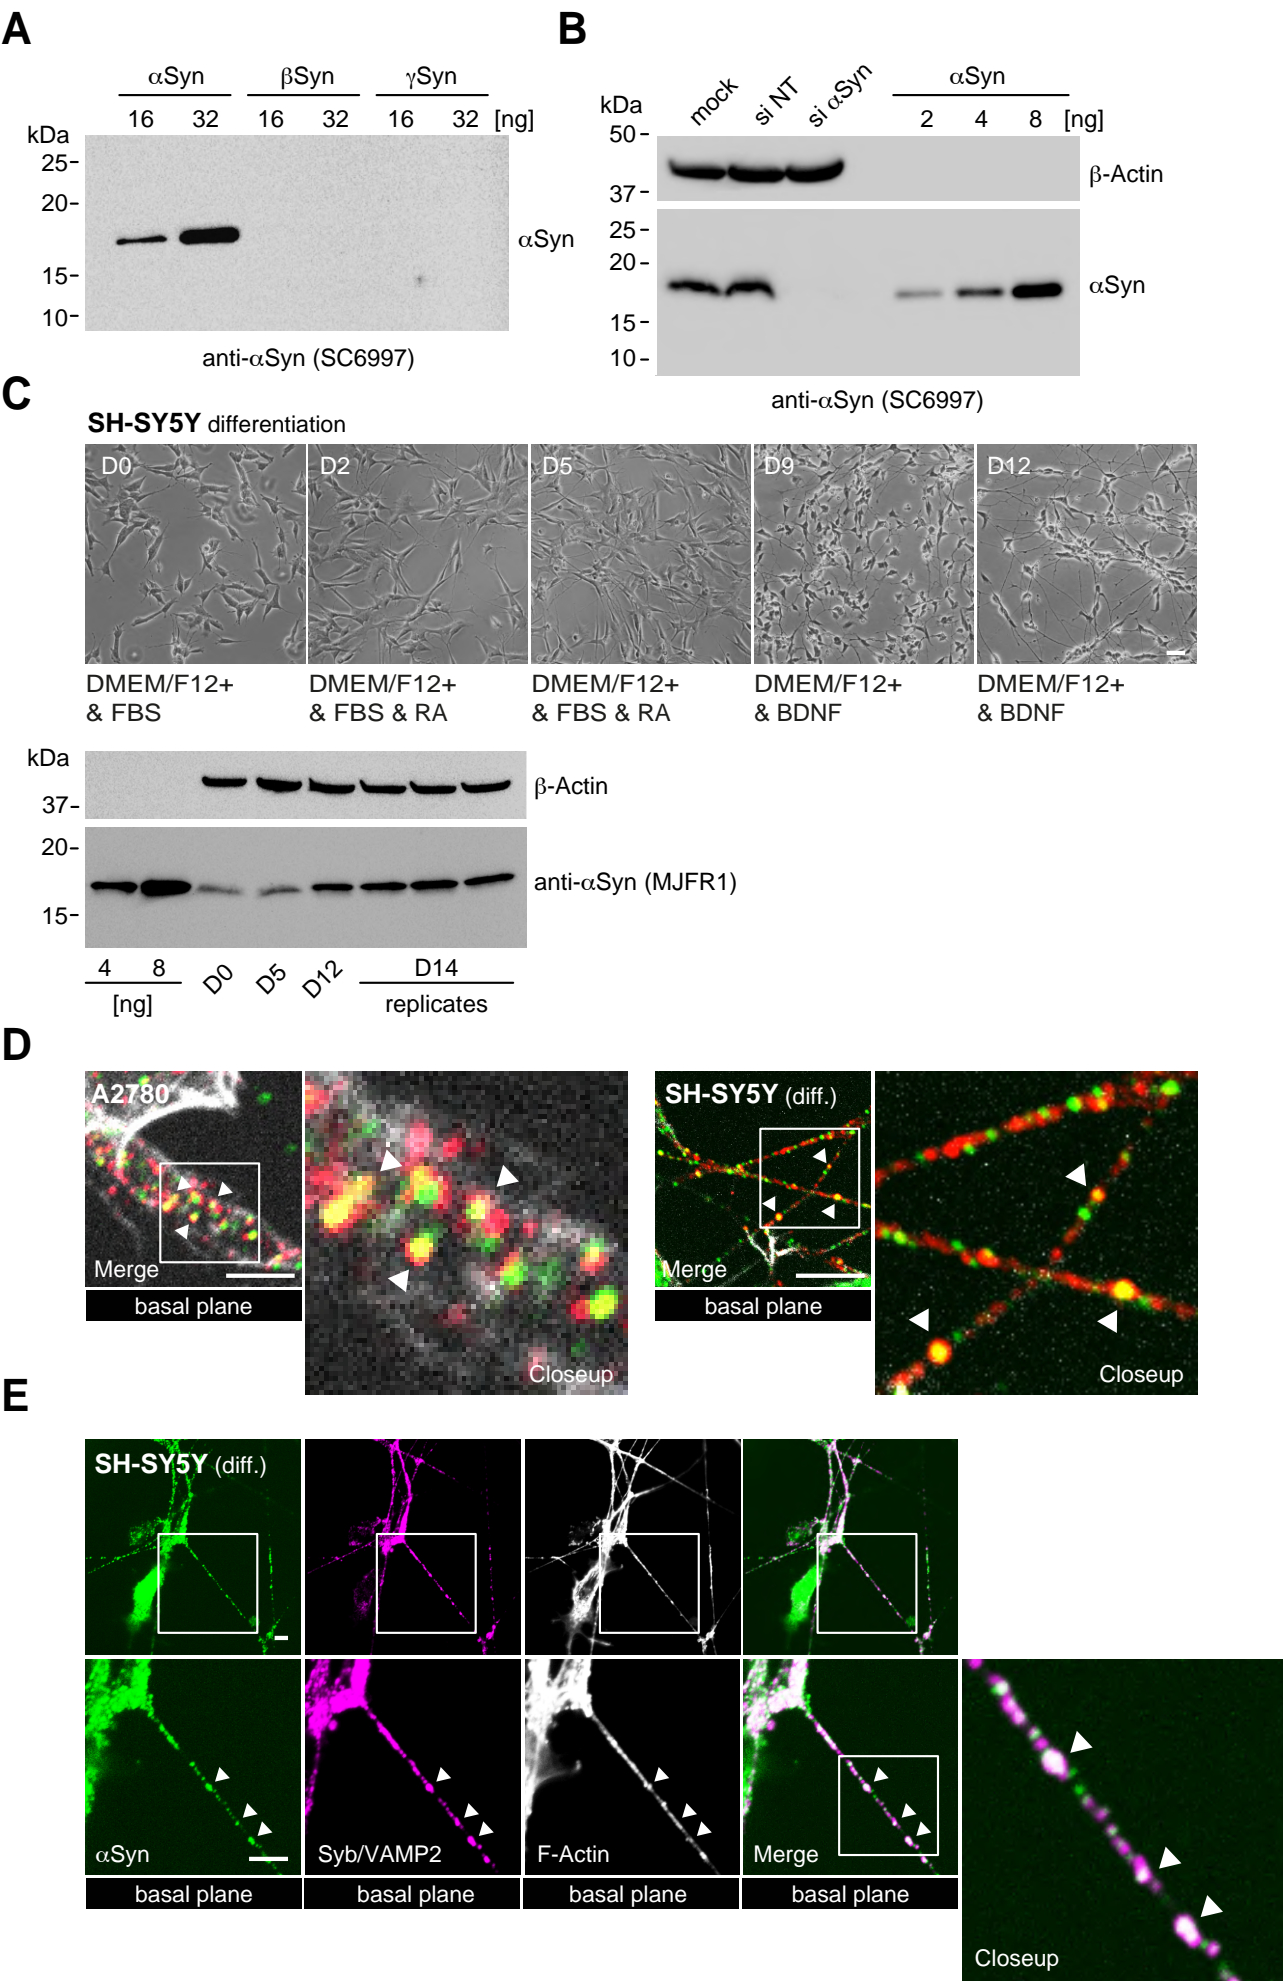

Supplement: supp [file elife-61951-supp-v1.zip › elife_poa_e61951_Figure_1_figure_supplement_1.pdf]

Figure 1 - figure supplement 2

A

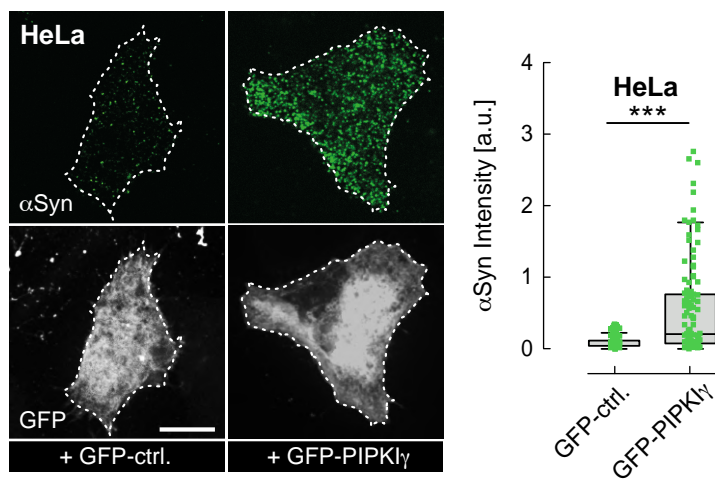

B

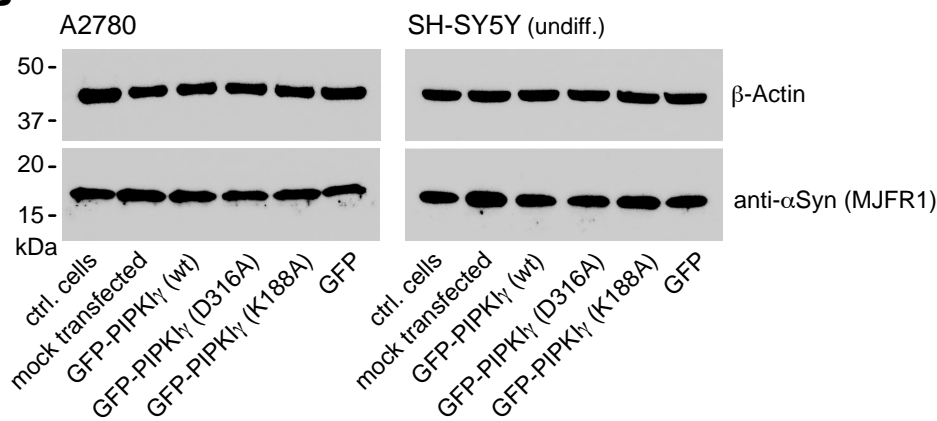

C

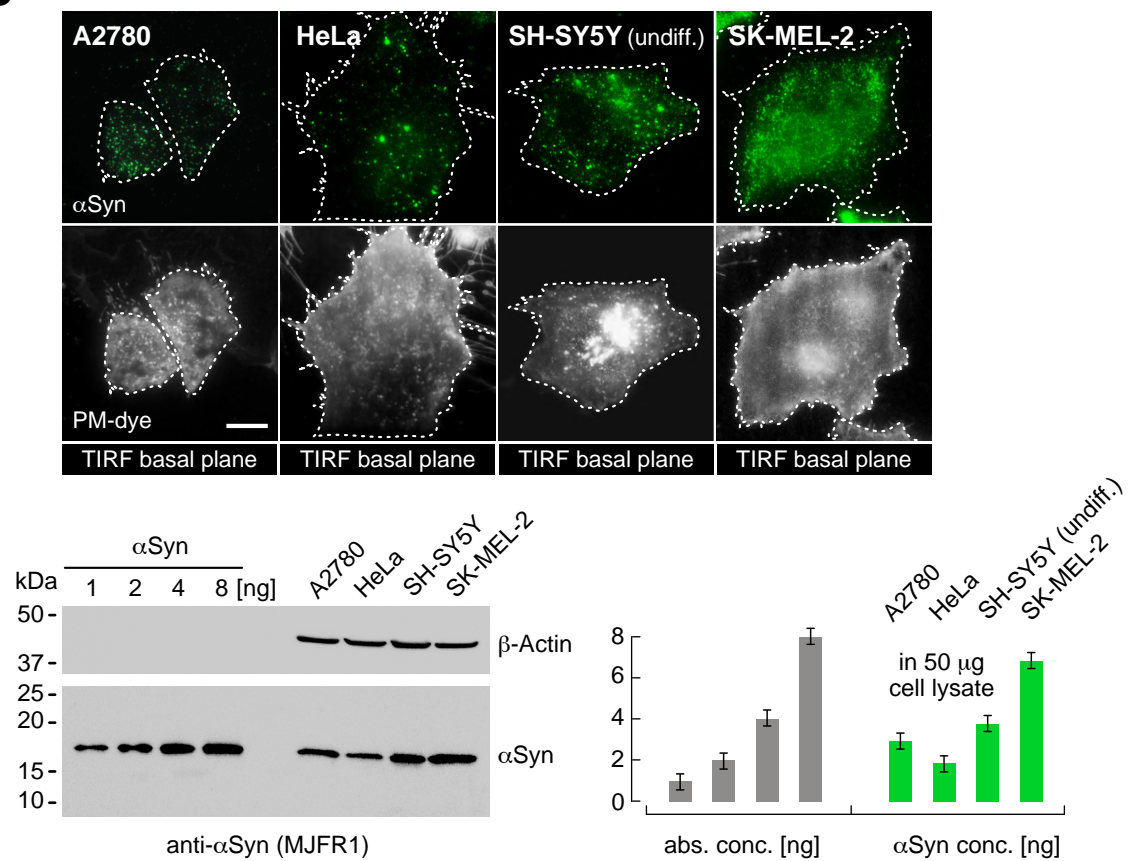

Supplement: supp [file elife-61951-supp-v1.zip › elife_poa_e61951_Figure_1_figure_supplement_2.pdf]

Figure 2 - figure supplement 1

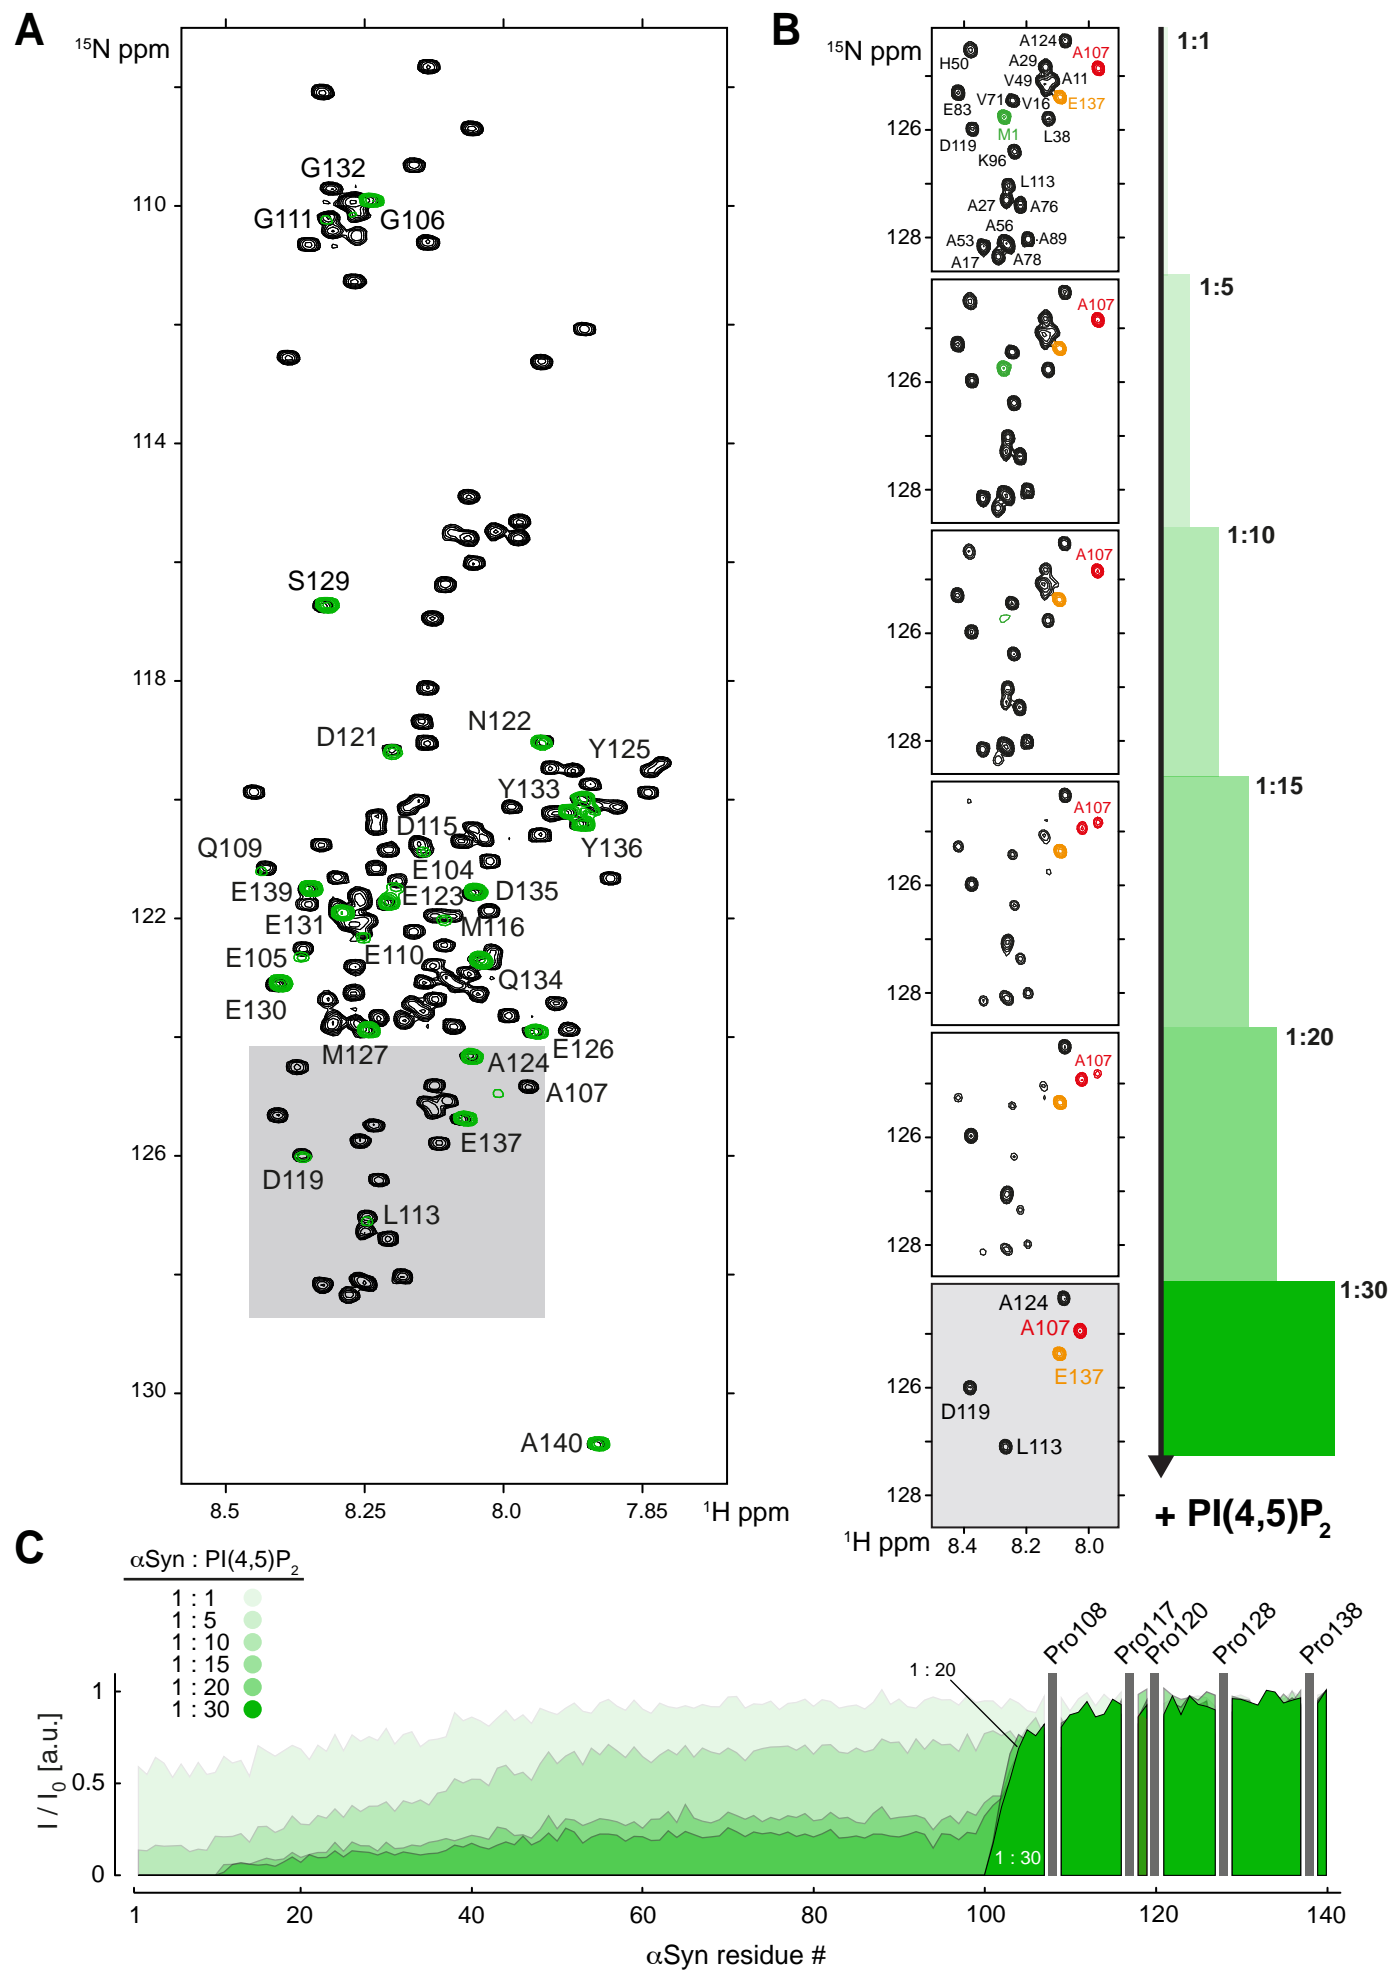

Supplement: supp [file elife-61951-supp-v1.zip › elife_poa_e61951_Figure_2_figure_supplement_1.pdf]

Figure 2 - figure supplement 2

A

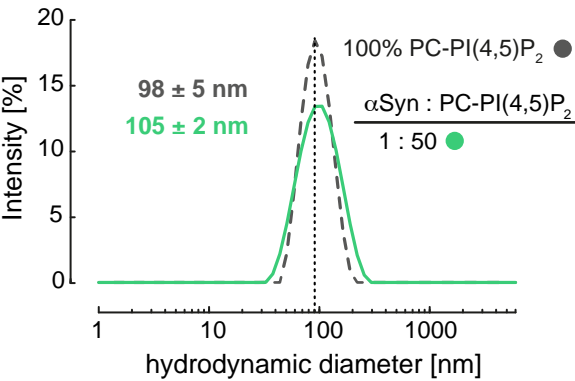

B

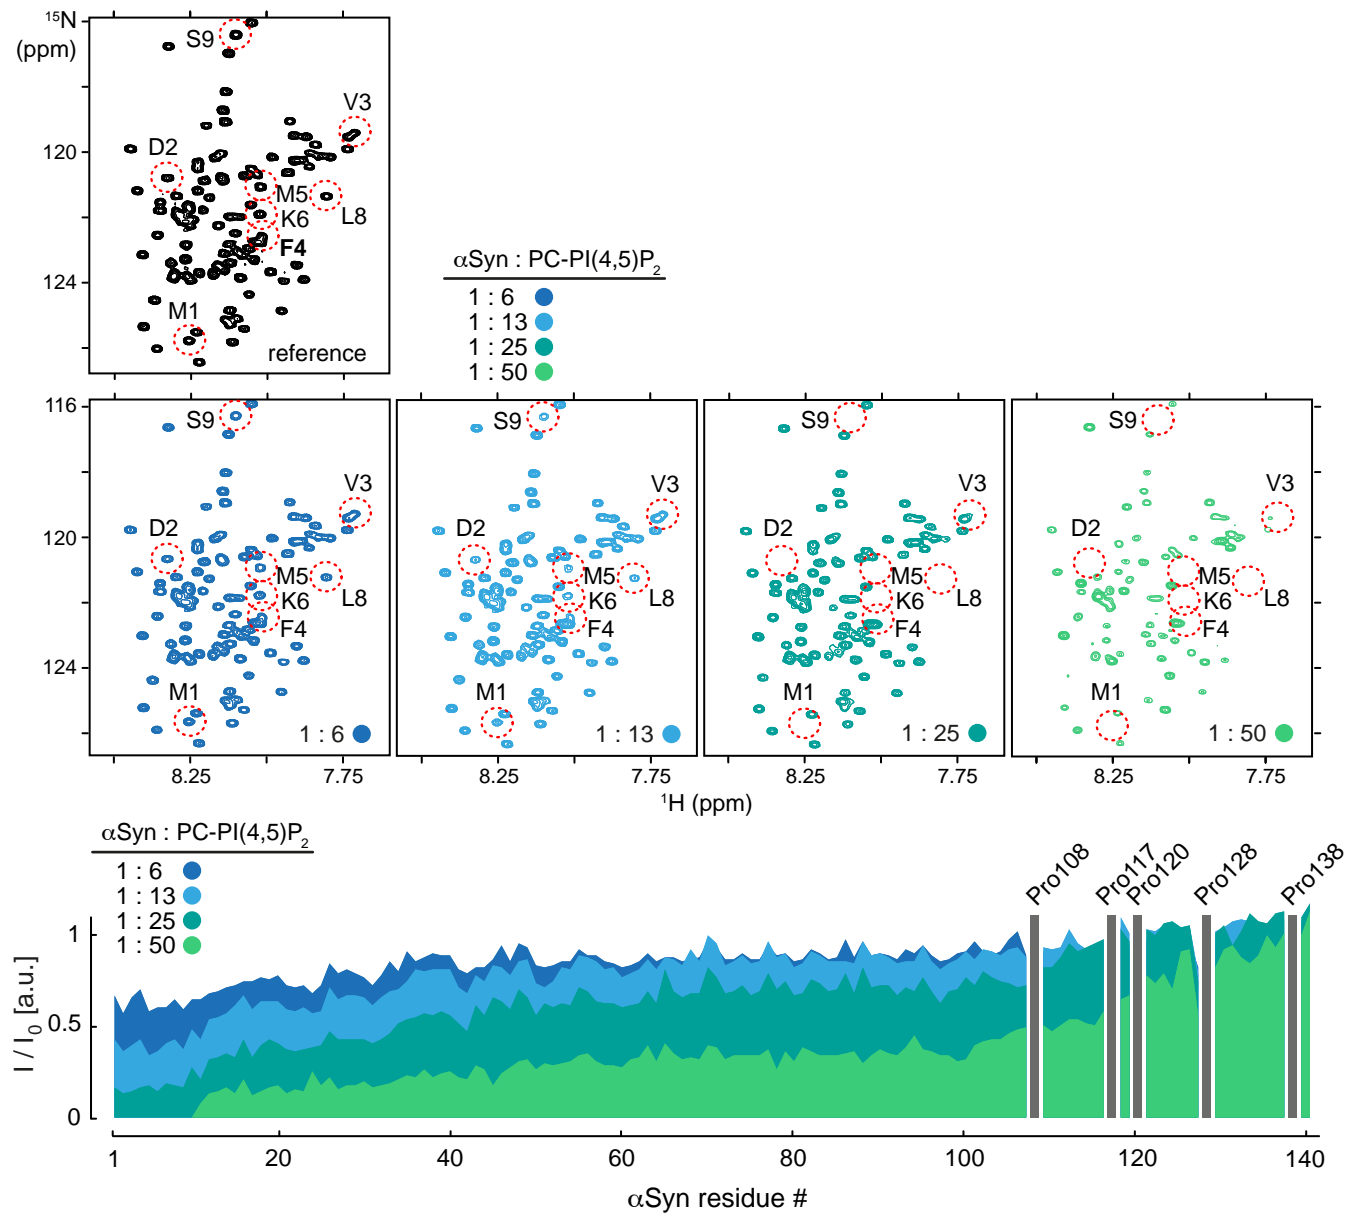

Supplement: supp [file elife-61951-supp-v1.zip › elife_poa_e61951_Figure_2_figure_supplement_2.pdf]

Figure 2 - figure supplement 3

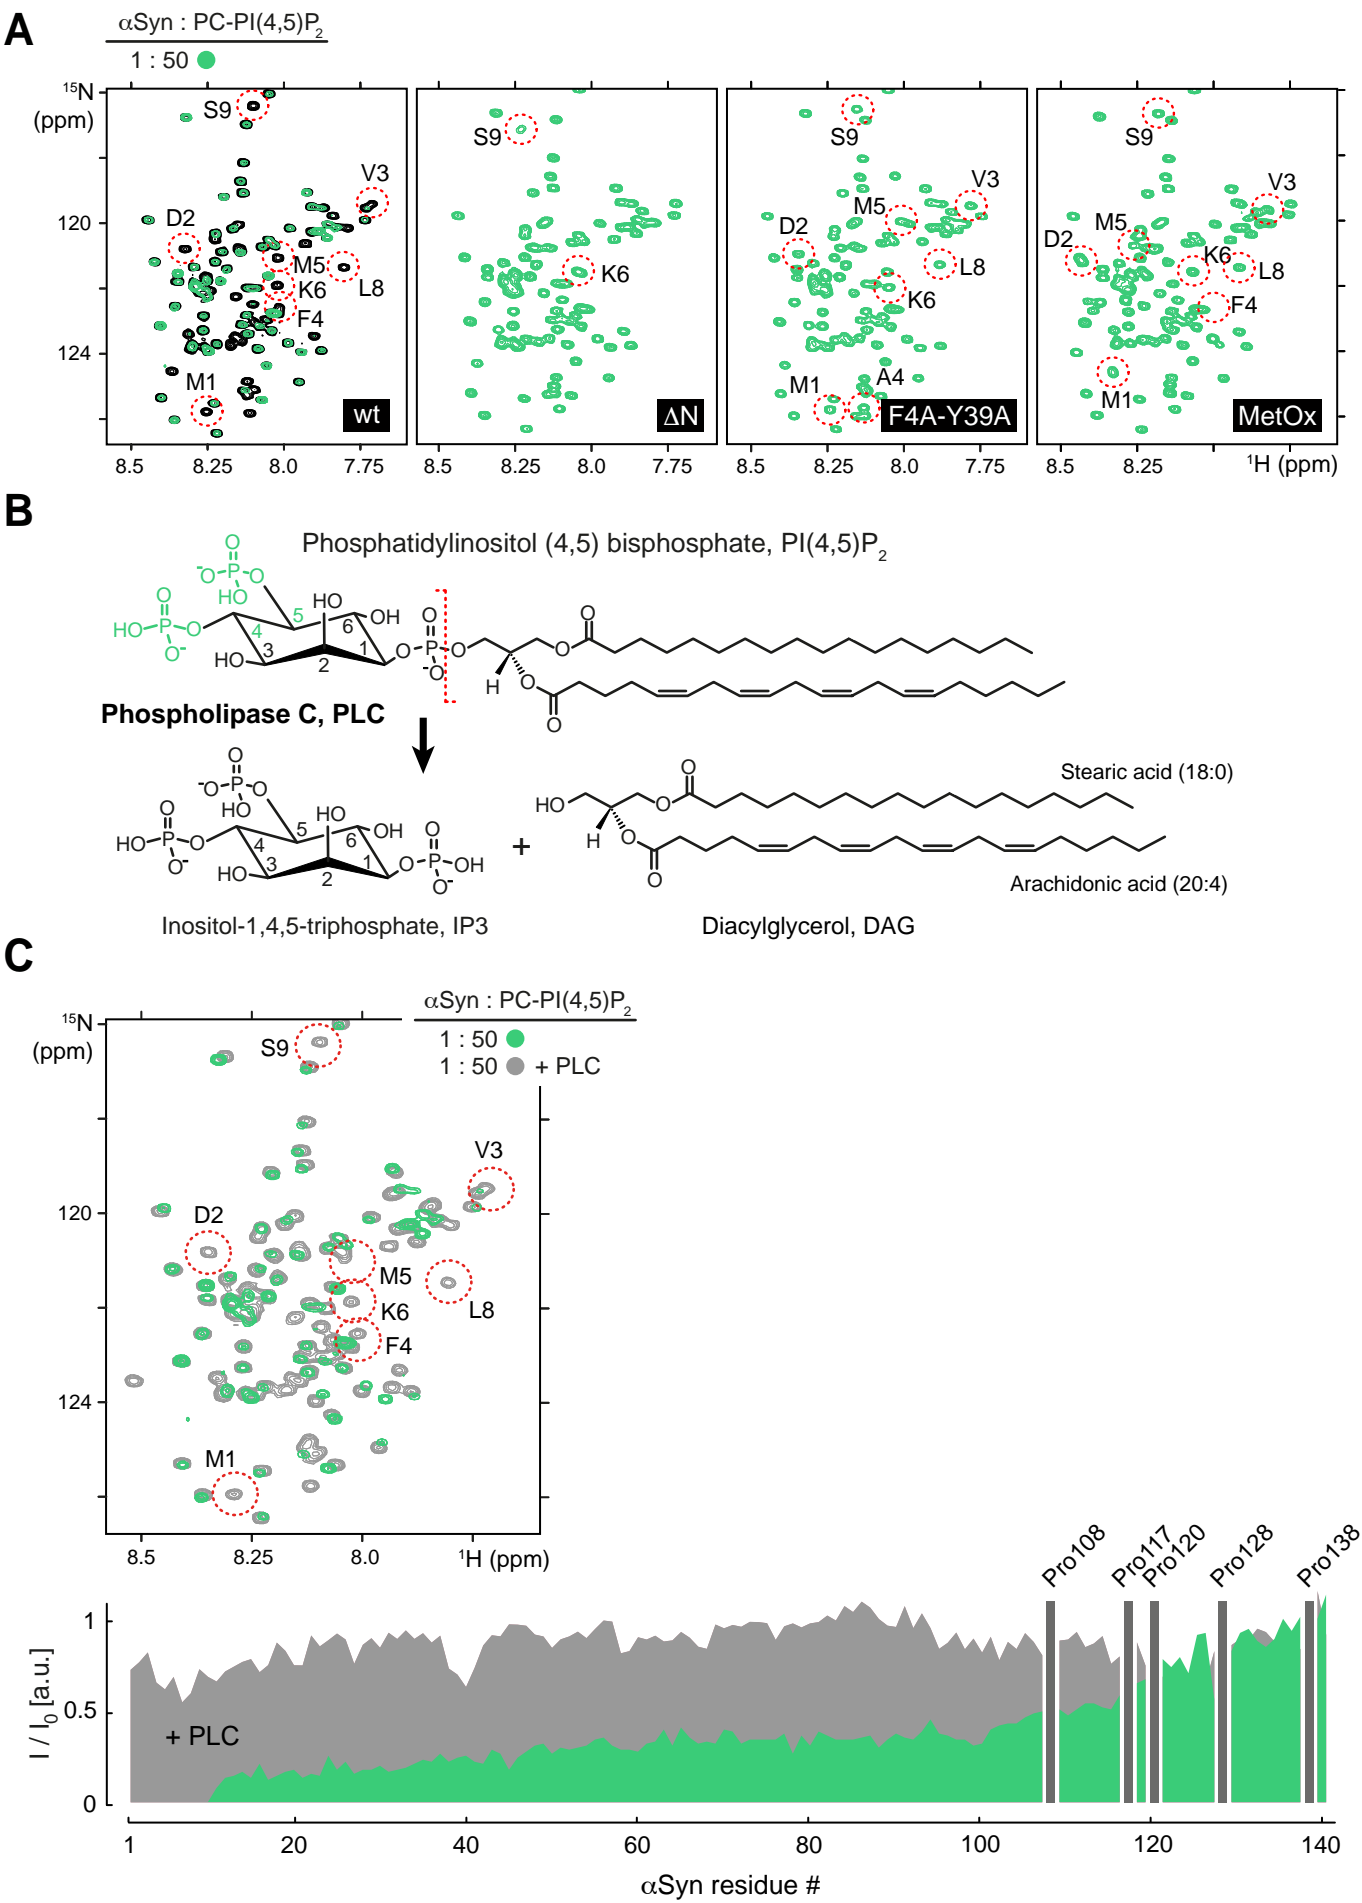

Supplement: supp [file elife-61951-supp-v1.zip › elife_poa_e61951_Figure_2_figure_supplement_3.pdf]

Figure 2 - figure supplement 4

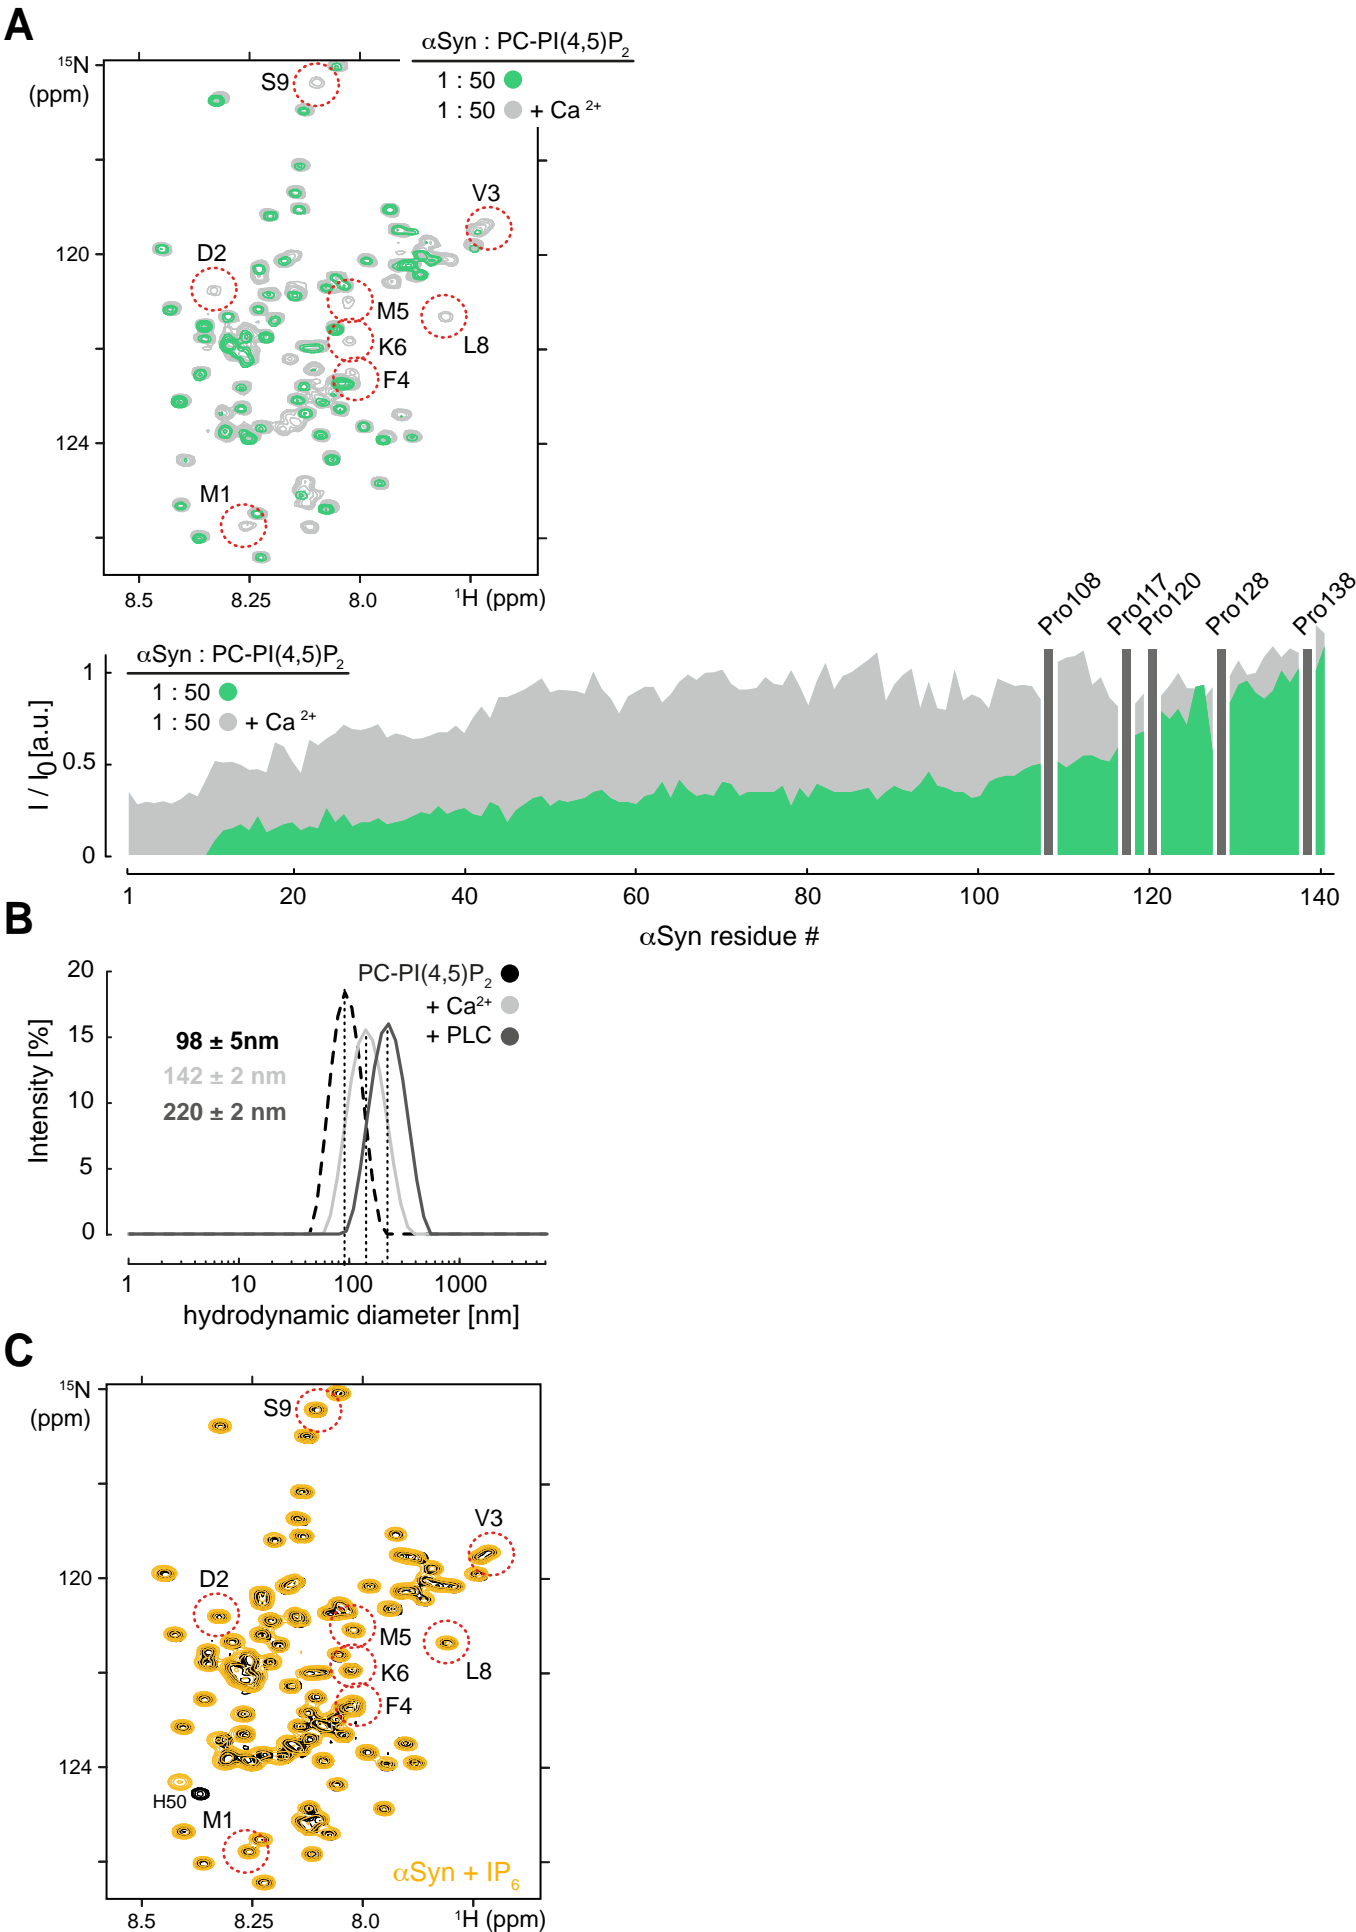

Supplement: supp [file elife-61951-supp-v1.zip › elife_poa_e61951_Figure_2_figure_supplement_4.pdf]

Figure 3 - figure supplement 1

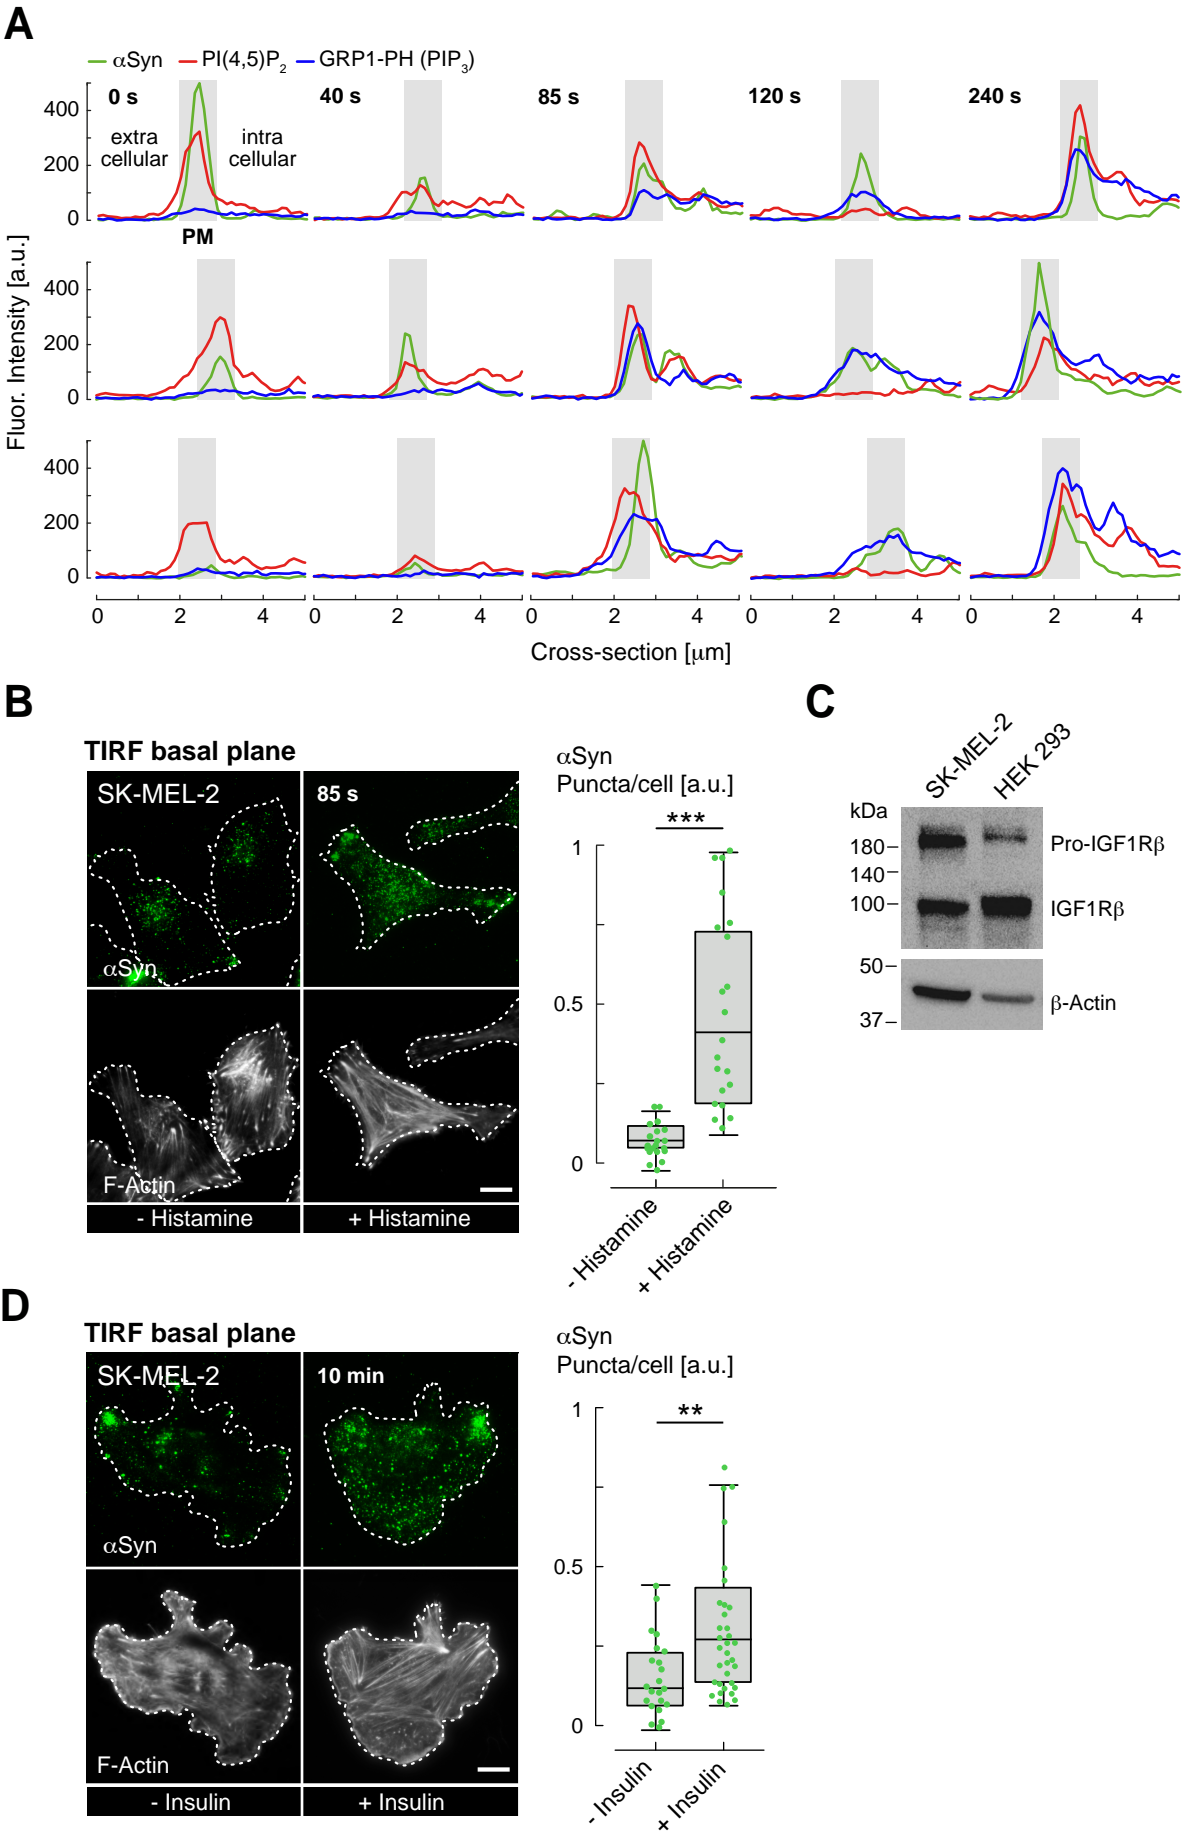

Supplement: supp [file elife-61951-supp-v1.zip › elife_poa_e61951_Figure_3_figure_supplement_1.pdf]

siRNA-mediated gene silencing of  $\alpha$ Syn in A2780 cells

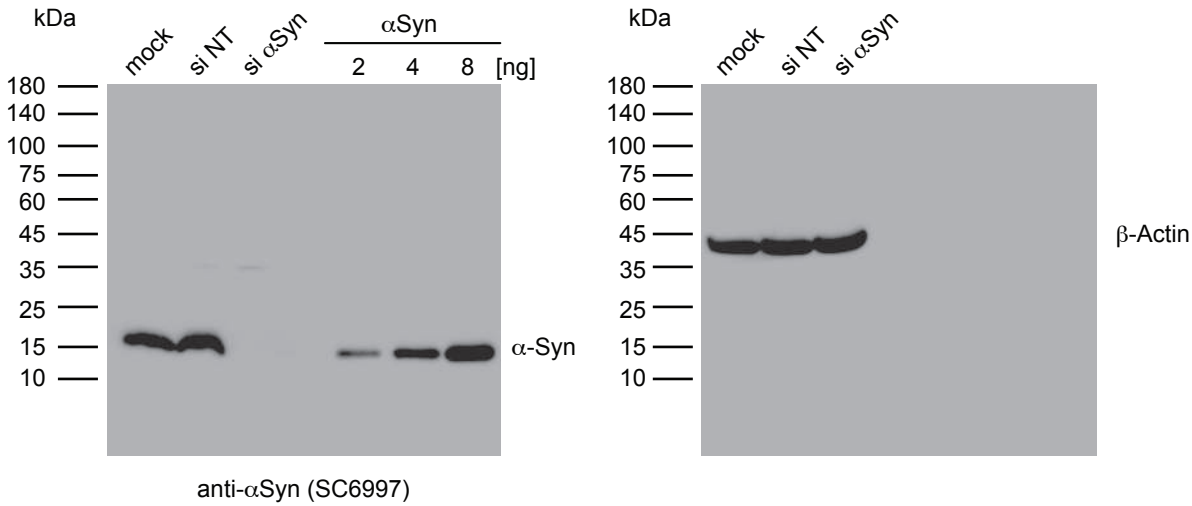

Supplement: supp [file elife-61951-supp-v1.zip › elife_poa_e61951_Figure_1_figure_supplement_1_source_data_1.pdf]

Endogenous  $\alpha$ Syn concentration increases during differentiation of SH-SY5Y cells

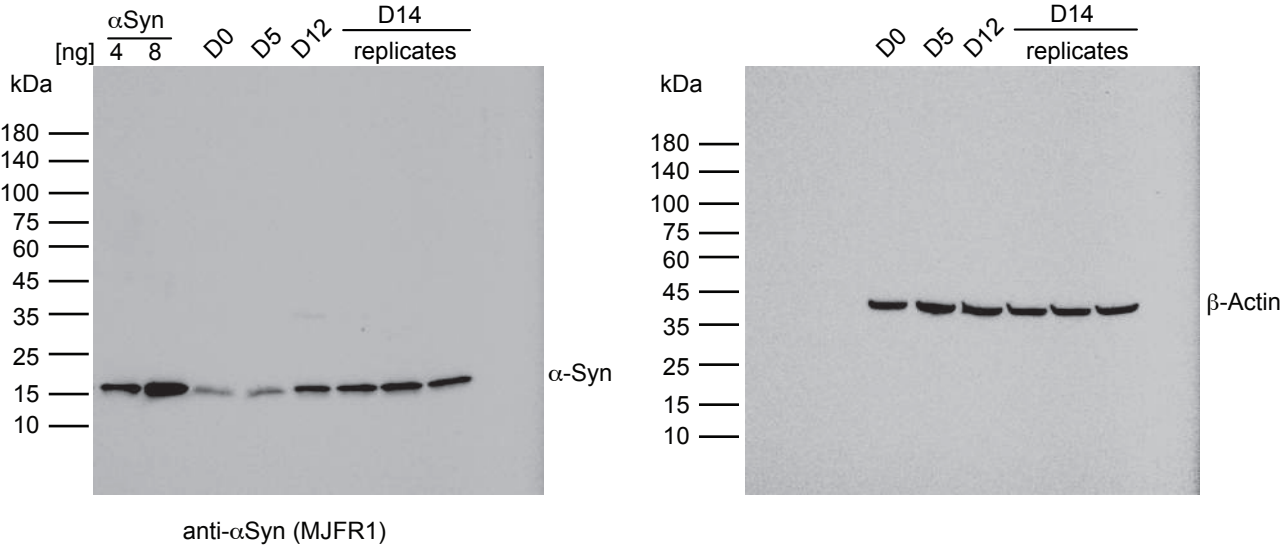

Supplement: supp [file elife-61951-supp-v1.zip › elife_poa_e61951_Figure_1_figure_supplement_1_source_data_2.pdf]

Endogenous  $\alpha$ Syn levels in commonly used human cell lines

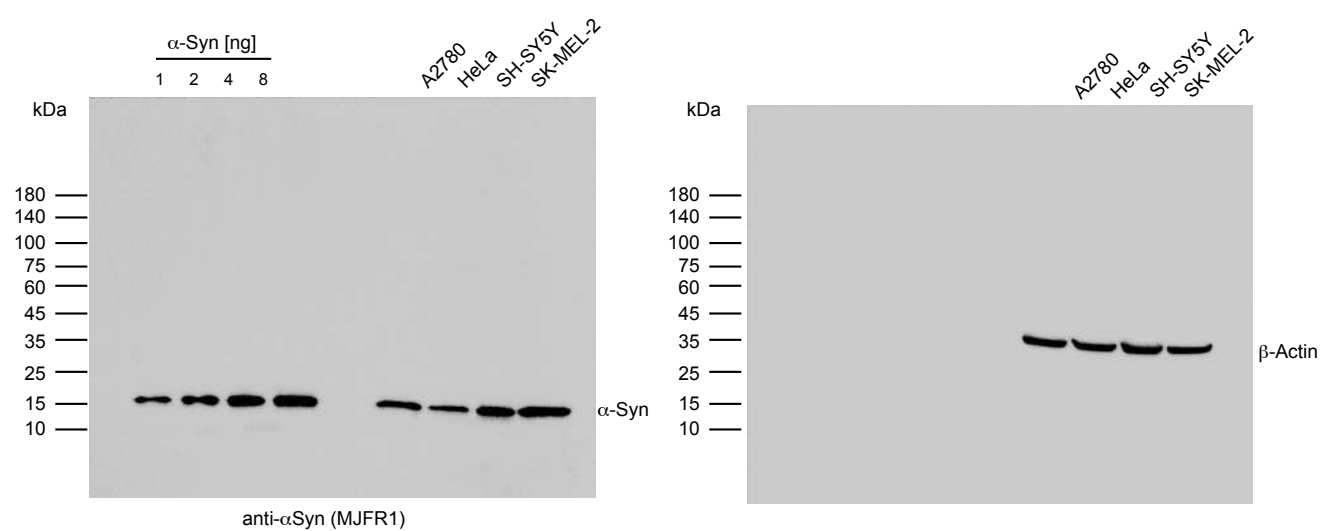

Supplement: supp [file elife-61951-supp-v1.zip › elife_poa_e61951_Figure_1_figure_supplement_2_source_data_3.pdf]

Endogenous insulin like growth factor receptor  $\beta$  (IGF-R $\beta$ ) in SK-MEL-2 and HEK 293 cells

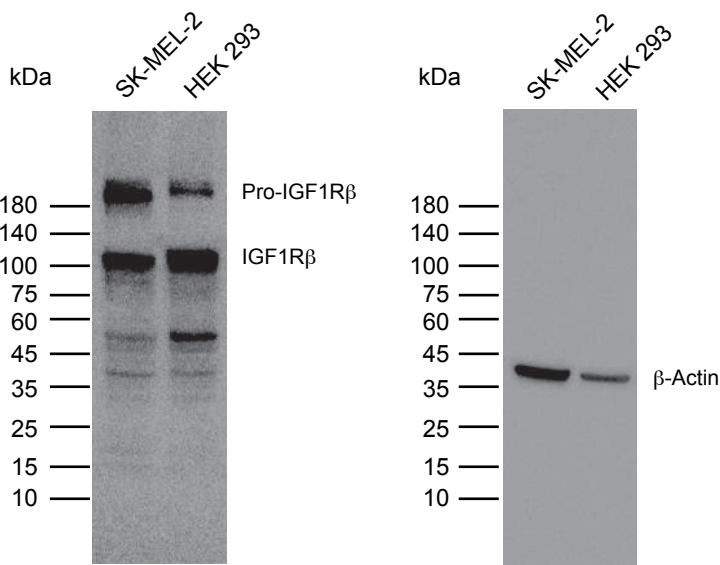

Supplement: supp [file elife-61951-supp-v1.zip › elife_poa_e61951_Figure_3_figure_supplement_1_source_data_2.pdf]
